# Supplementary material for: Solvent-controlled chemo-selective synthesis of 2-amino-3-(3-(5-hydroxy-1H-pyrazol-4-yl)-2-oxoindolin-3-yl)naphthalene-1,4-diones and 1H-spiro[benzo[6,7]chromeno[2,3-c]pyrazole-4,3'-indoline]-2',5,10-triones
Source: Research Square preprint supplement (doi:10.21203/rs.3.rs-6693319/v1), 2025-06-09
Supplement: Supplementary file 1 [file 402ced5bbb3138f9544330f4.docx]

**Supporting information**

**Solvent-controlled chemo-selective synthesis of 2-amino-3-(3-(5-hydroxy-1*H*-pyrazol-4-yl)-2-oxoindolin-3-yl)naphthalene-1,4-diones and 1*H*-spiro[benzo[6,7]chromeno[2,3-c]pyrazole-4,3'-indoline]-2',5,10-trione**

Hamzeh Pezhman, Mohammad Reza Mohammadizadeh*,

*‡ Department of Chemistry, Faculty of Nano and Bio Sciences and Technology, Persian Gulf University, Bushehr 75169, Iran. E-mail:* *Mrmohamadizadeh@pgu.ac.ir; Fax: +98-771-4541494*

**Table of Contents**

| Page | |
| --- | --- |
| General information | 2 |
| General procedure for one-pot synthesis of 2-amino-3-(3-(5-hydroxy-1*H*-pyrazol-4-yl)-2-oxoindolin-3-yl)naphthalene-1,4-diones (**4a-k**) | 2 |
| General procedure for one-pot synthesis of 1*H*-spiro[benzo[6,7]chromeno[2,3-*c*]pyrazole-4,3'-indoline]-2',5,10-trione (**5a-h** ) | 2 |
| Spectrum information of the synthesized compounds | 3 |
| 1H‒NMR and 13C‒NMR spectrum of the synthesized compounds | 14 |

**1. Experimental**

***1.1. General informations:*** All reagents were purchased from commercial suppliers and used without further purification. All experiments were carried out under air atmosphere. Column chromatography was carried out with Merck silica gel 60 (63-200 mesh). Analytical TLC was performed with Merck silica gel 60 F254 plates, and the products were visualized by 1H-NMR and 13C-NMR (400 MHz and 100 MHz, respectively) spectra were recorded in CDCl3. Chemical shifts (δ) are reported in ppm using TMS as internal standard, and spin-spin coupling constants (J) are given in Hz. IR spectra were recorded on a Perkin-Elmer FT/IR 1760 as KBr pellets. MSESI spectra were obtained on Agilent 6450 spectrometer. Melting points were determined in open-end capillary tubes on a Büchi B-540 melting point apparatus and are uncorrected.

***1.2.*** ***General procedure for one-pot synthesis of 2-amino-3-(3-(5-hydroxy-1H-pyrazol-4-yl)-2-oxoindolin-3-yl)naphthalene-1,4-diones*** *(****4a-k****)*: 2-Amino-1,4-naphthoquinone (**2**) (1 mmol) was added to a round bottom flask containing EtOH (3 mL), isatin (**1**) (1 mmol) and 5-methyl-2-phenylpyrazolone (**3**) (1 mmol) and the resulting mixture stirred for 4 hours at 80 ℃. Reaction progress was monitored by TLC. After completion, the resulting mixture was filtered and the precipitate obtained washed with warm EtOH (2 mL) and dried at 50 °C until the products (**4a-k**) obtained in pure form. No additional operations were required for further purification.

***1.3.*** ***General procedure for one-pot synthesis of 1H-spiro[benzo[6,7]chromeno[2,3-c]pyrazole-4,3'-indoline]-2',5,10-trione*** *(****5a-h****)*: 2-amino-1,4-naphthoquinone (**2**) (1 mmol) was added to a round bottom flask containing AcOH (3 mL), isatin (**1**) (1 mmol) and and 5-methyl-2-phenylpyrazolone (**3**) (1 mmol) and the resulting mixture stirred for 4 hours at 80 ℃. The progress of the reaction was followed by TLC. After completion, the resulting mixture was filtered and the precipitate obtained washed with warm EtOH (2 mL) and dried at 50 °C until the products (**5a-h**) obtained in pure form. No additional operations were required for further purification.

**2-amino-3-(1-ethyl-3-(5-hydroxy-3-methyl-1-phenyl-1H-pyrazol-4-yl)-2-oxoindolin-3-yl)naphthalene-1,4-dione (4a)**

Orange powder; 95% yield; m.p. = 212 ℃; 1H-NMR (400 MHz, DMSO-*d6*) 𝛿 (ppm): 1.28 (t, *J* = 4 Hz, 3H, CH3), 1.41 (s, 2H, CH3 of enol/keto), 2.22 (s, 1H, CH3 of enol/keto), 3.66-3.82 (m, 2H, CH2), 5.48-6.82 (broad peak, 2H, NH2 and OH of enol/CH of keto), 6.82-7.52 (m,7H, arom), 7.52-7.9 (m, 5H, arom), 7.98 (d, *J* = 8 Hz, 1H, arom), 10.2-11.8 (broad peak, 1H, NH2); 13C-NMR (100 MHz, DMSO-*d6*) 𝛿 (ppm): 12.3, 15.1, 34.8, 47, 99.8, 108.2, 109.1, 114.5, 121.6, 122.2, 126.1, 126.2, 129.2, 129.3, 130, 130.2, 132.8, 132.9, 133.3, 135.2, 135.4, 143.4, 145.2, 148.2, 177.2, 180, 181.7, 181.8.

**2-amino-3-(3-(5-hydroxy-3-methyl-1-phenyl-1H-pyrazol-4-yl)-2-oxo-1-propylindolin-3-yl)naphthalene-1,4-dione (4b)**

Orange Powder; 95% yield; m.p. =214-216 ℃; 1H-NMR (400 MHz, DMSO-*d6*) 𝛿 (ppm): 0.93 (t, *J*= 8 Hz, 3H, CH3), 1.41 (s, 2H, CH3 of enol/keto), 1.68-1.8 (m, 2H, CH2), 2.22 (s, 1H, CH3 of enol/keto), 3.63-3.77 (m, 2H, CH2), 5.02-8.42 (m, 15H, arom and NH2 and OH of enol/CH of keto), 9.7-11.5 (broad peak, 1H, NH2,); 13C-NMR (100 MHz, DMSO-*d6*) 𝛿 (ppm): 11.7, 15.2, 19, 20.6, 41.7, 100, 108.3, 109.2, 114.4, 121.6, 122.2, 125.6, 126.1, 129.2, 129.3, 130, 130.2, 131.4, 132.8, 132.9, 133.3, 135.2, 135.4, 143.8, 145.2, 148.2, 177.5, 180, 181.7, 181.8.

**2-amino-3-(5-bromo-3-(5-hydroxy-3-methyl-1-phenyl-1H-pyrazol-4-yl)-2-oxo-1-propylindolin-3-yl)naphthalene-1,4-dione (4c)**

Chartreuse green Powder; 91% yield; m.p. = 216-219 ℃; 1H-NMR (400 MHz, DMSO-*d6*) 𝛿 (ppm): 0.9 (q, *J*= 8 Hz, 3H, CH3), 1.42-1.56 (broad peak, 1H, CH3 of enol/keto), 1.6-1.81 (m, 1H, CH2), 1.83-1.86 (m, 1H, CH2), 2.23 (s, 2H, CH3 of enol/keto), 3.92-4.01 (m, 2H, CH2), 6.76-7.03 (broad peak, 2H, NH2 and OH of enol/CH of keto), 7.1-7.3 (m, 1H, arom), 7.34-7.48 (m, 3H, arom), 7.57-7.86 (m, 6H, arom), 7.94-8.03 (m, 1H, arom), 10.5-12.56 (broad peak, 2H, NH2,); 13C-NMR (100 MHz, DMSO-*d6*) 𝛿 (ppm): 11, 19, 22.5, 42.8, 50.7, 56.5, 101.4, 112.7, 113.7, ,126.1, 126.3, 126.3, 129.1, 129.3, 130.1, 132.8, 133, 133, 133.4, 134.8, 135.2, 135.4, 140.3, 140.6, 148.3, 148.7, 177.9, 180.2, 181.4, 181.7.

**2-amino-3-(1-benzyl-3-(5-hydroxy-3-methyl-1-phenyl-1H-pyrazol-4-yl)-2-oxoindolin-3-yl)naphthalene-1,4-dione (4d)**

Amber Powder; 92% yield; m.p. =220 ℃; 1H-NMR (400 MHz, DMSO-*d6*) 𝛿 (ppm): 1.38 (s, 1H, CH3 of enol/keto), 2.23 (s, 2H, CH3 of enol/keto), 4.62-5.22 (m, 2H, CH2), 6.38-8.6 (m, 19H, NH2 and arom), 9.86-11.94 (m, 2H, NH2 and OH of enol/ CH of keto).

**2-amino-3-(1-benzyl-5-bromo-3-(5-hydroxy-3-methyl-1-phenyl-1H-pyrazol-4-yl)-2-oxoindolin-3-yl)naphthalene-1,4-dione (4e)**

Chartreuse green Powder; 91 % yield; m.p. = 228-230 ℃; 1H-NMR (400 MHz, DMSO-*d6*) 𝛿 (ppm): 1.38 (s, 1H, CH3 of enol/keto), 2.23 (s, 2H, CH3 of enol/keto), 4.65-5.2 (m, 2H, CH2), 5.8-8.82 (m, 19H, NH2 and arom), 8.76-12.08 (broad peak, 1H, NH2 and OH); 13C-NMR (100 MHz, DMSO-*d6*) 𝛿 (ppm): 43.4, 51, 113.7, 126.1, 126.3, 127.3, 127.7, 128.8, 128.9, 129.2, 129.3, 132.7, 133, 133.5, 135.4, 136.9, 142.9, 180, 181.5.

**2-amino-3-(5-bromo-1-(3,5-dimethylbenzyl)-3-(5-hydroxy-3-methyl-1-phenyl-1H-pyrazol-4-yl)-2-oxoindolin-3-yl)naphthalene-1,4-dione (4f)**

Orange powder; 89% yield; m.p. >230 ℃; 1H-NMR (400 MHz, DMSO-*d6*) 𝛿 (ppm): 1.14-2.35 (m, 9H, CH3), 4.55-5.18 (m, 2H, CH2), 5.9-8.35 (m, 16H, NH2 and arom), 8.98-12.54 (m, 2H, NH2 and OH of enol/ CH of keto); 13C-NMR (100 MHz, DMSO-*d6*) 𝛿 (ppm): 21.2, 21.3, 43.1, 48.3, 51, 110.3, 111.3, 113.6, 118.9, 121.8, 124.8, 125.1, 126, 126.2, 126.3, 128.8, 129.1, 129.3, 130.2, 130.4, 132.7, 133, 133.2, 133.4, 135.2, 135.4, 136.6, 137.8, 137.9, 142.8, 148.6, 177.4, 180, 181.5, 181.8.

**2-amino-3-(5-chloro-3-(5-hydroxy-3-methyl-1-phenyl-1H-pyrazol-4-yl)-1-(4-methoxybenzyl)-2-oxoindolin-3-yl)naphthalene-1,4-dione (4g)**

Orange powder; 90% yield; m.p. >230 ℃; 1H-NMR (400 MHz, DMSO-*d6*) 𝛿 (ppm): 1.31 (s, 2H, CH3 of enol/keto), 2.23 (s, 1H, CH3 of enol/keto), 3.72 (d, *J* = 16 Hz 3H, OCH3), 4.7-5.4 (m, 2H, CH2), 6.32-8.3 (m, 18H, NH2 and OH of enol/CH of keto and arom), 10.18-10.92 (broad peak, 1H, NH2). 13C-NMR (100 MHz, DMSO-*d6*) 𝛿 (ppm): 13.1, 15, 42.9, 55.5, 109.7, 114.1, 114.3, 121.8, 122.4, 126.2, , 128.9, 129.3, 130, 132.8, 133, 133.3, 135.2, 135.5, 143.1, 143.5, 158.7, 158.9, 177.7, 180, 181.7, 181.8.

**2-amino-3-(5-bromo-1-(2-chlorobenzyl)-3-(5-hydroxy-3-methyl-1-phenyl-1H-pyrazol-4-yl)-2-oxoindolin-3-yl)naphthalene-1,4-dione (4h)**

Orange Powder; 90% yield; m.p. = 218-223 ℃; 1H NMR (400 MHz, DMSO-*d6*) 𝛿 (ppm): 1.41 (s, 2H, CH3 of enol/keto), 2.24 (s, 1H, CH3 of enol/keto), 4.7-5.4 (m, 2H, CH2), 5.7-9.6 (m, 18H, NH2 and OH of enol/CH of keto and arom), 10.1-11.8 (broad peak, 1H, NH2); 13C NMR (100 MHz, DMSO-*d6*) 𝛿 (ppm): 41.5, 41.7, 50.9, 108.4, 109.2, 114.1, 121.8, 122.2, 122.7, 126.1, 126.3, 127.5, 127.7, 128.1, 128.4, 128.7, 129.2, 129.3, 129.5, 129.7, 129.9, 130, 130.3, 132.2, 132.4, 132.8, 133.133.1, 133.4, 134.2, 135.2, 135.5, 143.1, 143.3, 147.9, 148.3, 177.9, 180, 180.5, 181.6, 181.8.

**2-amino-3-(5-bromo-3-(5-hydroxy-3-methyl-1-phenyl-1H-pyrazol-4-yl)-1-(4-nitrobenzyl)-2-oxoindolin-3-yl)naphthalene-1,4-dione (4i)**

Chartreuse green Powder; 89% yield; m.p. = 220 - 222 ℃; 1H NMR (400 MHz, DMSO- *d6*) 𝛿 (ppm): 1.43 (s, 1H, CH3 of enol/keto), 2.26 (s, 2H, CH3 of enol/keto), 5.12 (s, 2H, CH2), 6.24-9.43 (m, 18H, NH2 and OH and arom), 10.18-12.08 (broad peak, 1H, NH2); 13C NMR (100 MHz, DMSO-*d6*) 𝛿 (ppm): 43.1, 53, 113, 114, 119.3, 123.8, 124.1, 126.1, 126.3, 128.7, 129, 129.2, 129.3, 129.4, 130.1, 130.5, 131.6, 132.8, 133, 133.1, 133.4, 135.2, 135.4, 142.5, 145.1, 147.1, 147.3, 177.5, 180.1, 181.5, 181.8.

**2-amino-3-(3-(5-hydroxy-3-methyl-1-phenyl-1H-pyrazol-4-yl)-1-(naphthalen-1-ylmethyl)-2-oxoindolin-3-yl)naphthalene-1,4-dione (4j)**

Chartreuse green Powder; 92% yield; m.p. = 225-227 ℃; 1H NMR (400 MHz, DMS0-*d6*) 𝛿 (ppm): 1.21 (s, 2H, CH3 of enol/keto), 2.29 (s, 1H, CH3 of enol/keto), 5.28 (t, , *J* = 16 Hz, 1H, CH2), 5.60 (t, *J* = 16 Hz, 1H, CH2), 6.11- 8.78 (m, 22H, NH2 and OH and NH2 and arom), 9.94-11.82 (broad peak, 1H, NH2); 13C NMR (100 MHz, DMSO-*d6*)𝛿 (ppm): 41.8, 42.3, 51, 108.8, 109.8, 114.2, 121.9, 122.4, 123.7, 124.4, 125.4, 125.7, 126.1, 126.2, 126.4, 126.6, 127.9, 130.1, 130.3, 131, 131.1, 132.1, 132.8, 133, 133.2, 133.4, 133.7, 133.8, 135.2, 135.5, 143.4, 143.7, 177.9, 180, 181.6, 181.8.

**3,3'-(butane-1,4-diylbis(3-(5-hydroxy-3-methyl-1-phenyl-1H-pyrazol-4-yl)-2-oxoindoline-1,3-diyl))bis(2-aminonaphthalene-1,4-dione)** **(4k)**

Brown Powder; 86% yield; m.p. >230 ℃; 1H NMR (400 MHz, DMS0-*d6*) 𝛿 (ppm): 1.37 (s, 2H, CH3 of enol/keto), 1.66-2.02 (broad peak, 2H, CH2), 2.22 (s, 1H, CH3 of enol/keto), 3.64-4.02(m, 2H, CH2), 6.14-8.43 (m, 15, NH2 and OH and arom), 10.23-11.6 (broad peak, 1H, NH2).

**1'-ethyl-3-methyl-1-phenyl-1H-spiro[benzo[6,7]chromeno[2,3-c]pyrazole-4,3'-indoline]-2',5,10-trione (5a)**

Light brown Powder; 96% yield; m.p. >230 ℃; 1H NMR (400 MHz, CDCl3) 𝛿 (ppm): 1.51 (t, *J=*7.2 Hz ,3H, CH3), 1.76 (s, 3H, CH3), 4.02 (q, *J* = 7.2 Hz, 2H, CH2), 6.94-7.17 (m, 3H, arom), 7.32-7.44 (m, 2H, arom), 7.49-7.60 (m, 2H, arom), 7.65-7.82 (m, 2H, arom), 7.84-8.08 (m, 3H, arom), 8.11-8.27(m, 1H, arom); 13C NMR (100 MHz, CDCl3) 𝛿 (ppm): 12.3, 12.4, 35.4, 48.4, 97.4, 108.4, 120.4, 121.8, 123, 124.1, 126.6, 126.6, 127, 129.2, 129.4, 130.3, 131.5, 133.9, 134, 134.7, 137.6, 142.5, 144.8, 145.1, 152., 175.8, 177.2, 182.4.

**3-methyl-1-phenyl-1'-propyl-1H-spiro[benzo[6,7]chromeno[2,3-c]pyrazole-4,3'-indoline]-2',5,10-trione (5b)**

Light brown powder; 95% yield; m.p. >230 ℃; 1H-NMR (400 MHz, CDCl3) 𝛿 (ppm): 1.16 (t, *J=*7.4 Hz ,3H, CH3), 1.75 (s, 3H, CH3), 1.87-2.05 (m, 2H, CH2), 3.81-3.97 (m, 2H, CH2), 6.96-7.11 (m, 3H, arom), 7.32-7.44 (m, 2H, arom), 7.50-7.59 (m, 2H, arom), 7.68-7.80 (m, 2H, arom), 7.87-8.0 (m, 3H, arom), 8.14-8.22 (m, 1H, arom); 13C-NMR (100 MHz, CDCl3) 𝛿 (ppm): 11.7, 12.3, 42.6, 48.4, 97.5, 108.5, 120.4, 121.8, 123, 124, 126.6, 127, 129.1, 129.4, 130.3, 131.5, 133.9, 133.9, 134.7, 137.6, 143, 144.8, 145.1, 152, 176.1, 177.3, 182.4.

**5'-bromo-1',3-dimethyl-1-phenyl-1H-spiro[benzo[6,7]chromeno[2,3-c]pyrazole-4,3'-indoline]-2',5,10-trione (5c)**

Yellow powder; 86% yield; m.p. >230 ℃; 1H-NMR (400 MHz, CDCl3) 𝛿 (ppm): 0.84 (s,3H, CH3), 1.23 (s, 3H, CH3), 7.69-7.92 (m, 3H, arom), 7.98-8.13 (broad peak, 1H, arom), 8.18-8.30 (broad peak, 1H, arom) 8.40 (s, 1H, arom), 8.75-9.05 (m, 3H, arom), 9.17-9.37 (broad peak, 1H, arom), 10.25 (s, 1H, arom), 11.32-11.53 (broad peak, 1H, arom).

**5'-bromo-1'-(3,5-dimethylbenzyl)-3-methyl-1-phenyl-1H-spiro[benzo[6,7]chromeno[2,3-c]pyrazole-4,3'-indoline]-2',5,10-trione (5d)**

Yellow powder; 89% yield; m.p. >230 ℃; 1H-NMR (400 MHz, CDCl3) 𝛿 (ppm): 1.71 (s, 3H, CH3), 2.38 (two overlapped singlet, 6H, CH3), 4.96 (d, *J* =16, 1H, CH2), 5.13 (d, *J* =16, 1H, CH2), 6.84 (d, *J* =8, 1H, arom), 7.00 (s, 1H, arom), 7.14-7.24 (m, 3H, arom), 7.32-7.44 (m, 2H, arom), 7.51-7.60 (m, 2H, arom), 7.73-7.84 (m, 2H, arom), 7.92 (ddd, *J* =8, 2H, arom), 7.96-8.01 (m, 1H, arom), 8.17-8.26 (m, 1H, arom); 13C-NMR (100 MHz, CDCl3) 𝛿 (ppm): 12.4, 20.6, 21.3, 44.9, 48.4, 96.9, 110.9, 115.8, 120.5, 121.1, 125.7, 126.7, 126.8, 126.9, 127.1, 129.4, 129.6, 130.4, 131.5, 132, 134.2, 134.9, 135, 135.5, 137.5, 138.4, 141.9, 144.8, 145, 152.1, 175.9, 177, 182.3.

**1'-(4-methoxybenzyl)-3-methyl-1-phenyl-1H-spiro[benzo[6,7]chromeno[2,3-c]pyrazole-4,3'-indoline]-2',5,10-trione (5e)**

Yellow powder; 89% yield; m.p. >230 ℃; 1H-NMR (400 MHz, CDCl3) 𝛿 (ppm): 1.61 (s, 3H, CH3), 3.84 (s, 3H, OCH3), 5.00 (d, *J* =15.2, 1H, CH2), 5.17 (d, *J* =15.2, 1H, CH2), 6.93-7.09 (m, 5H, arom), 7.23-7.31 (m, 1H, arom), 7.32-7.39 (t, *J* =7.3, 1H, arom), 7.49-7.61 (m, 4H, arom), 7.70-7.83 (m, 2H, arom), 7.88-7.95 (dd, *J* =8.9, 2H, arom), 7.97-8.02 (m, 1H, arom), 8.15-8.25 (m, 1H, arom); 13C-NMR (100 MHz, CDCl3) 𝛿 (ppm): 12.3, 44.4, 48.5, 55.3, 97.5, 109.3, 114.2, 120.4, 121.6, 123.2, 124, 126.6, 126.7, 127, 127.7, 129.1, 129.4, 129.4, 130.4, 131.5, 133.7, 134, 134.8, 137.6, 142.7, 144.8, 145.2, 152.1, 159.2, 176.3, 177.2, 182.4.

**1'-(3,5-dimethylbenzyl)-3-methyl-1-phenyl-1H-spiro[benzo[6,7]chromeno[2,3-c]pyrazole-4,3'-indoline]-2',5,10-trione (5f)**

Yellow powder; 92% yield; m.p. >230 ℃; 1H-NMR (400 MHz, CDCl3) 𝛿 (ppm): 1.71 (s, 3H, CH3), 2.36 (two overlapped singlet, 6H, CH3), 4.94 (d, *J* =16, 1H, CH2), 5.16 (d, *J* =16, 1H, CH2), 6.82 (d, *J* =8, 1H, arom), 7.10 (s, 1H, arom), 7.12-7.23 (m, 3H, arom), 7.35-7.48 (m, 2H, arom), 7.49-7.58 (m, 2H, arom), 7.68-7.77 (m, 2H, arom), 7.95 (ddd, *J* =8, 2H, arom), 7.92-8.05 (m, 1H, arom), 8.18-8.25 (m, 1H, arom); 13C-NMR (100 MHz, CDCl3) 𝛿 (ppm): 12.4, 20.6, 21.3, 44.9, 48.4, 96.9, 110.9, 115.8, 120.5, 121.1, 125.7, 126.7, 126.8, 126.9, 127.1, 129.4, 129.6, 130.4, 131.5, 132, 134.2, 134.9, 135, 135.5, 137.5, 138.4, 141.9, 144.8, 145, 152.1, 175.9, 177, 182.3.

**1'-(2-chlorobenzyl)-3-methyl-1-phenyl-1H-spiro[benzo[6,7]chromeno[2,3-c]pyrazole-4,3'-indoline]-2',5,10-trione (5g)**

Yellow powder; 92% yield; m.p. >230 ℃; 1H-NMR (400 MHz, CDCl3) 𝛿 (ppm): 1.76 (s, 3H, CH3), 5.11 (d, *J* =16, 1H, CH2), 5.44 (d, *J* =16.5, 1H, CH2), 6.91 (d, *J* =8, 1H, arom), 7.02-7.10 (m, 2H, arom), 7.23-7.29 (m, 2H, arom), 7.29-7.43 (m, 2H, arom), 7.48-7.61 (m, 3H, arom), 7.73-7.84 (m, 2H, arom), 7.84-7.95 (m, 3H, arom), 7.97-8.05 (m, 1H, arom), 8.17-8.25 (m, 1H, arom); 13C-NMR (100 MHz, CDCl3) 𝛿 (ppm): 12.5, 42.2, 48.6, 97.5, 109.4, 120.5, 121.5, 123.6, 123.9, 126.7, 126.8, 127.1, 127.4, 129, 129.1, 129.3, 129.4, 129.5, 130.4, 131.5, 132.8, 132.9, 133.6, 134.1, 134.8, 137.5, 142.4, 144.8, 145.1, 152.2, 176.6, 177.2, 182.5.

**5'-bromo-3-methyl-1'-(4-nitrobenzyl)-1-phenyl-1H-spiro[benzo[6,7]chromeno[2,3-c]pyrazole-4,3'-indoline]-2',5,10-trione (5h)**

Yellow powder; 92% yield; m.p. >230 ℃; 1H-NMR (400 MHz, CDCl3) 𝛿 (ppm): 1.75 (s, 3H, CH3), 4.91 (d, *J* =16.2, 1H, CH2), 5.54 (d, *J* =16.2, 1H, CH2), 6.69 (d, *J* =8.8, 1H, arom), 7.21 (d, *J* =2, 1H, arom), 7.33-7.43 (m, 2H, arom), 7.51-7.61 (m, 2H, arom), 7.75-7.88 (m, 4H, arom), 7.89-7.95 (m, 2H, arom), 7.97-8.07 (m, 1H, arom), 8.18-8.27 (m, 1H, arom), 8.29-8.37 (m, 2H, arom); 13C-NMR (100 MHz, CDCl3) 𝛿 (ppm): 12.5, 44.1, 48.3, 96.7, 110.3, 116.4, 120.5, 120.7, 124.2, 126.9, 127, 127.1, 127.5, 128.6, 129.5, 130.3, 131.3, 132.1, 134.4, 135, 135.4, 137.4, 140.9, 142.4, 144.6, 144.7, 147.7, 152.2, 175.9, 176.9, 182.6.

**1H-NMR and 13C-NMR spectrum of the synthesized compounds**


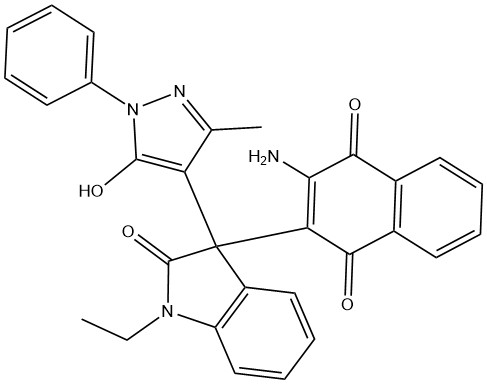


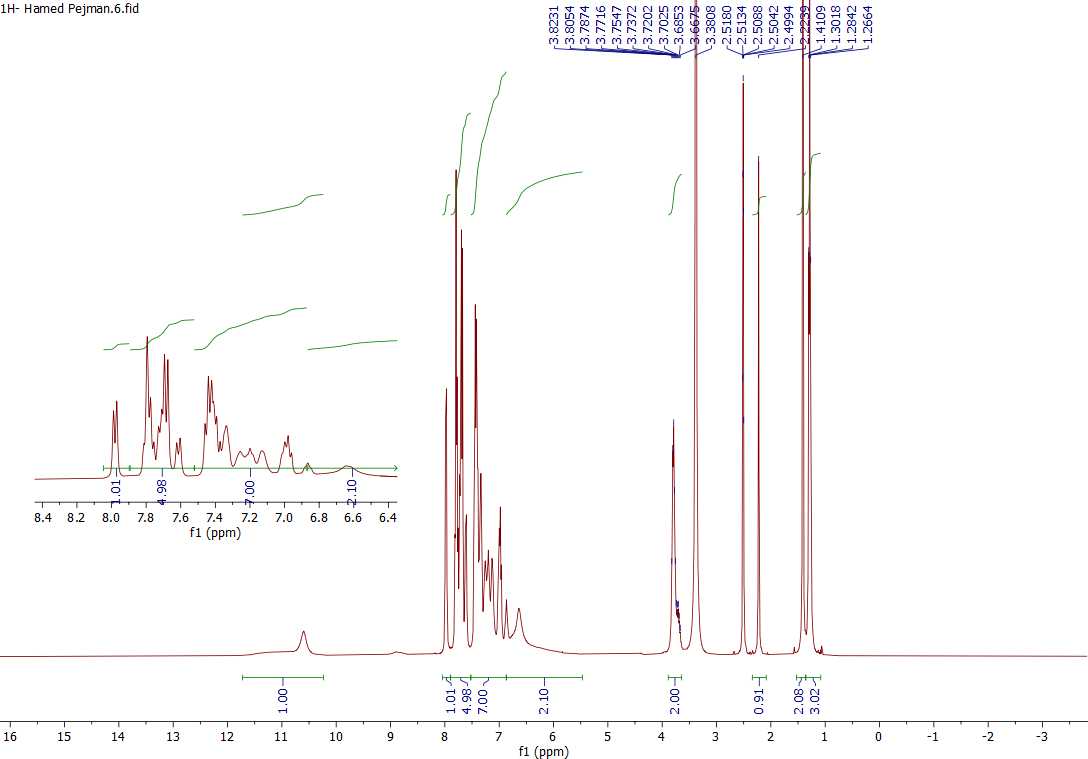


**Figure 1**: 1H-NMR spectrum of compound **4a**


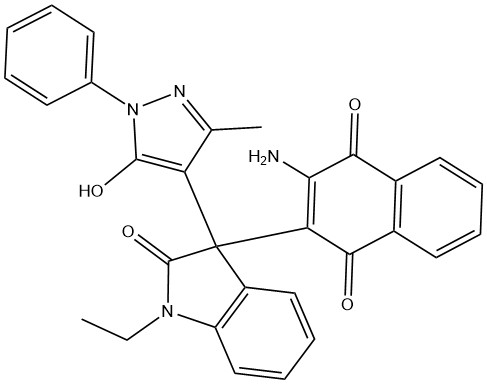


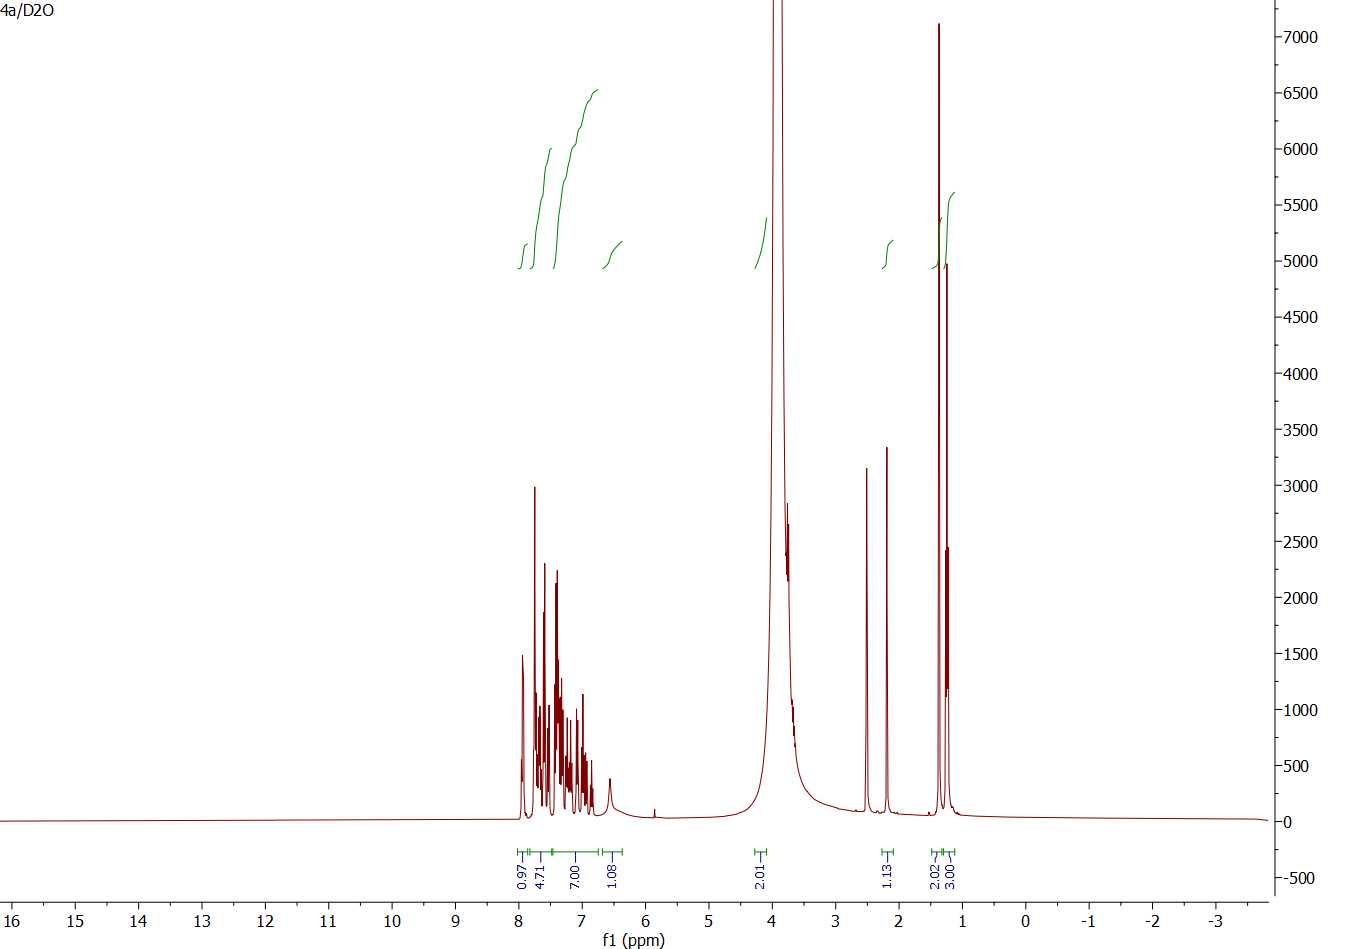


**Figure 2**: D2O spectrum of compound **4a**


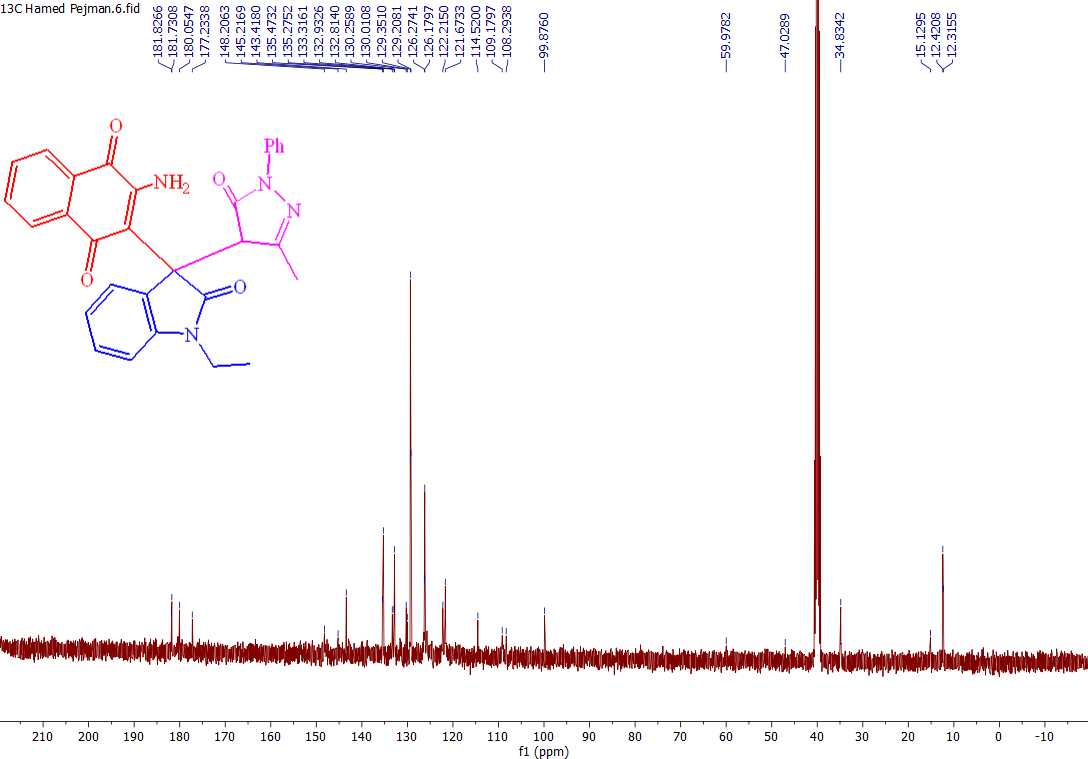


**Figure 3**: 13C-NMR spectrum of compound **4a**


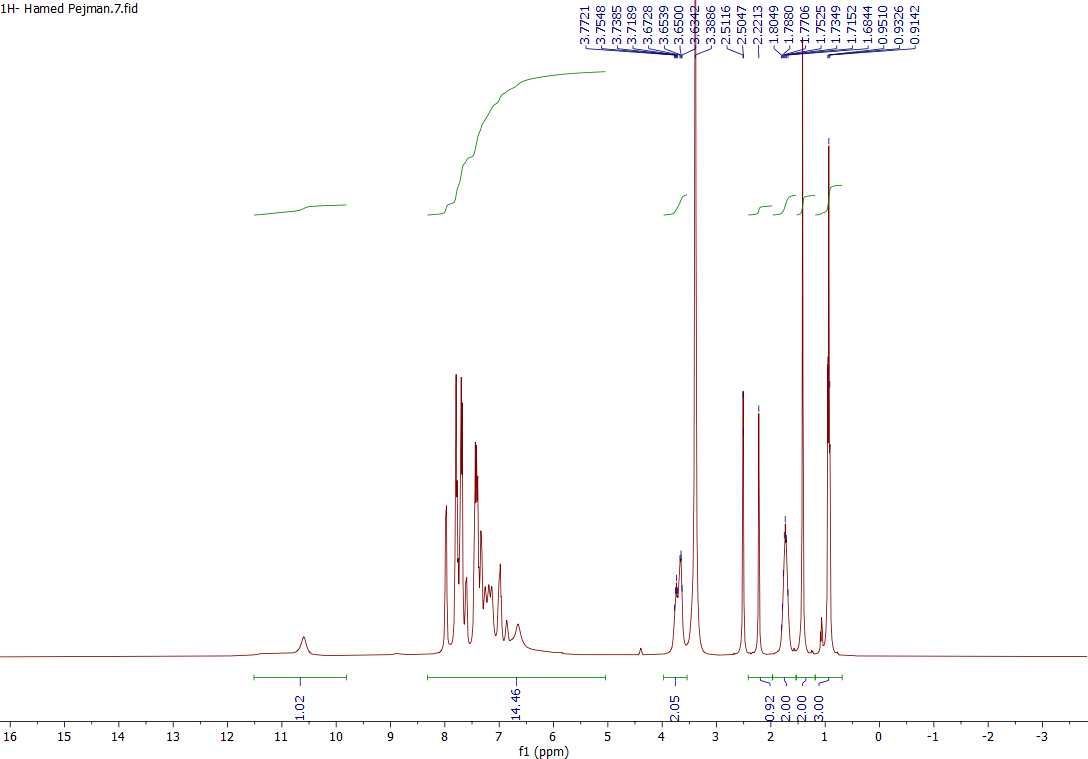


**
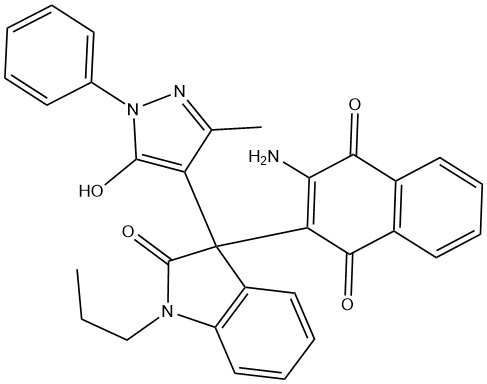
**

**Figure 4**: 1H-NMR spectrum of compound **4b**


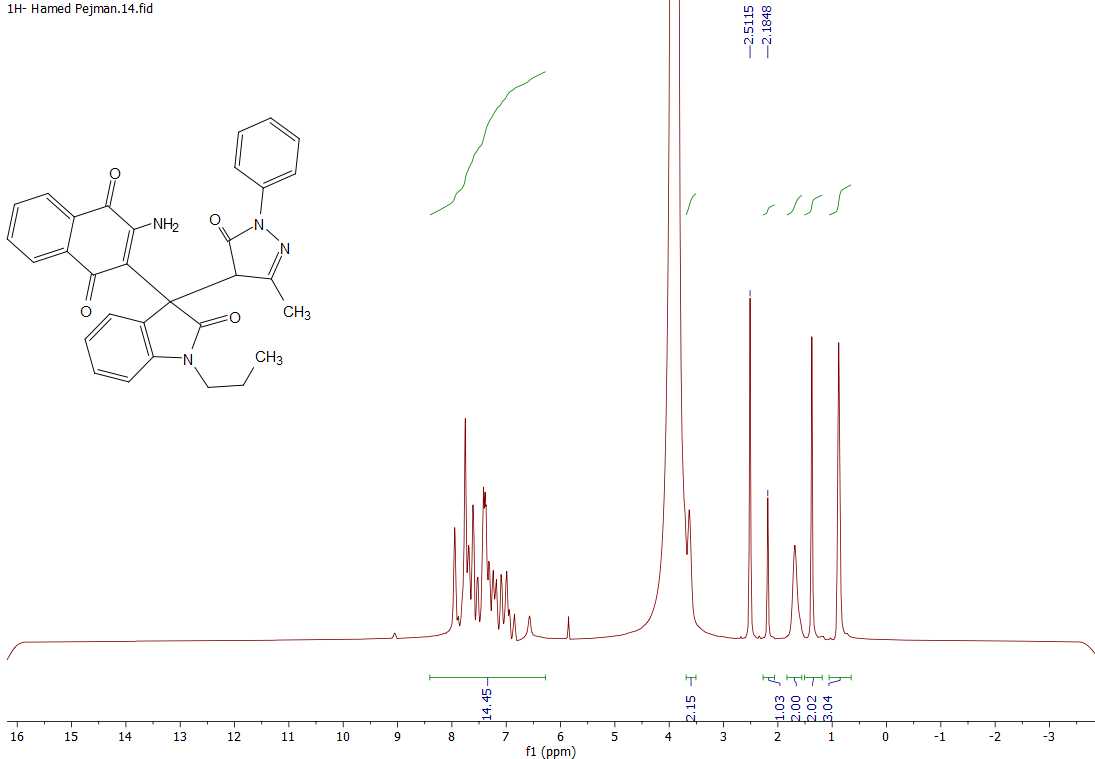


**Figure 5**: D2O spectrum of compound **4b**


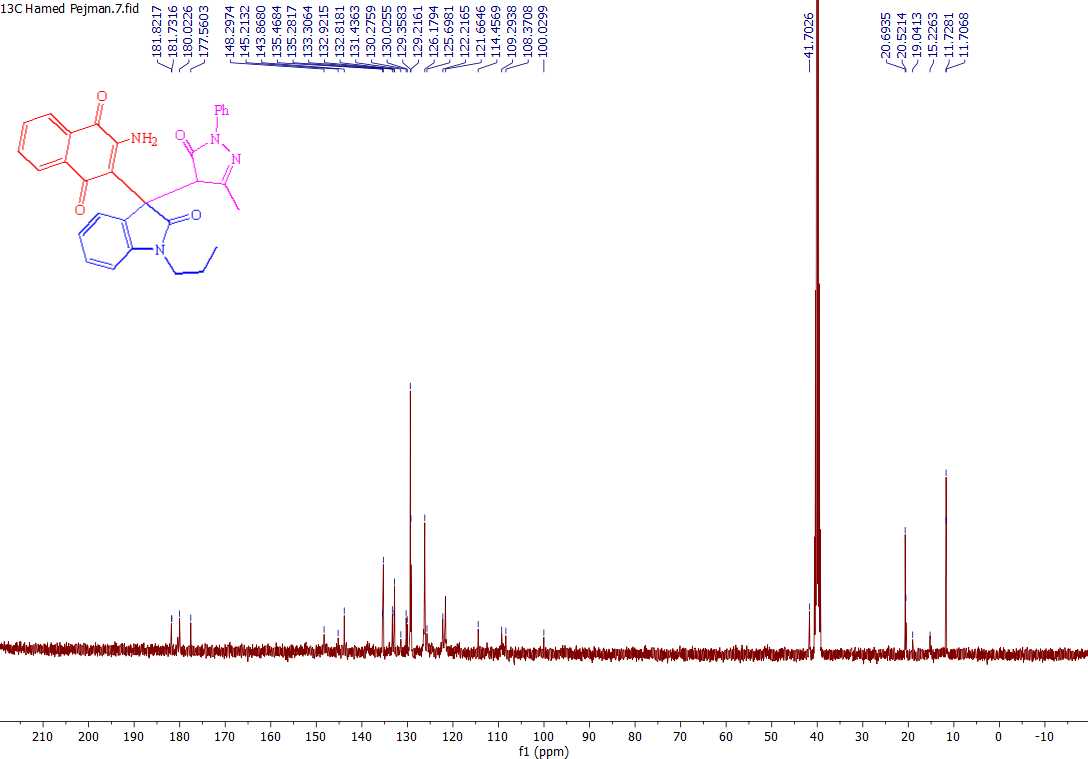


**
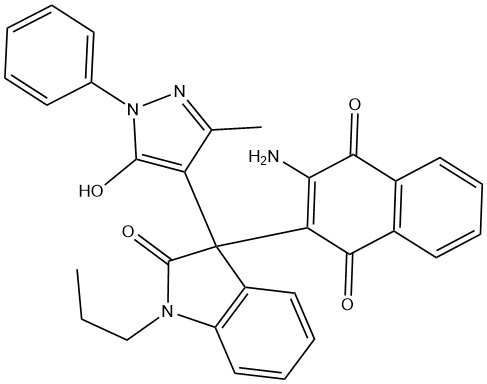
**

**Figure 6**: 13C-NMR spectrum of compound **4b**


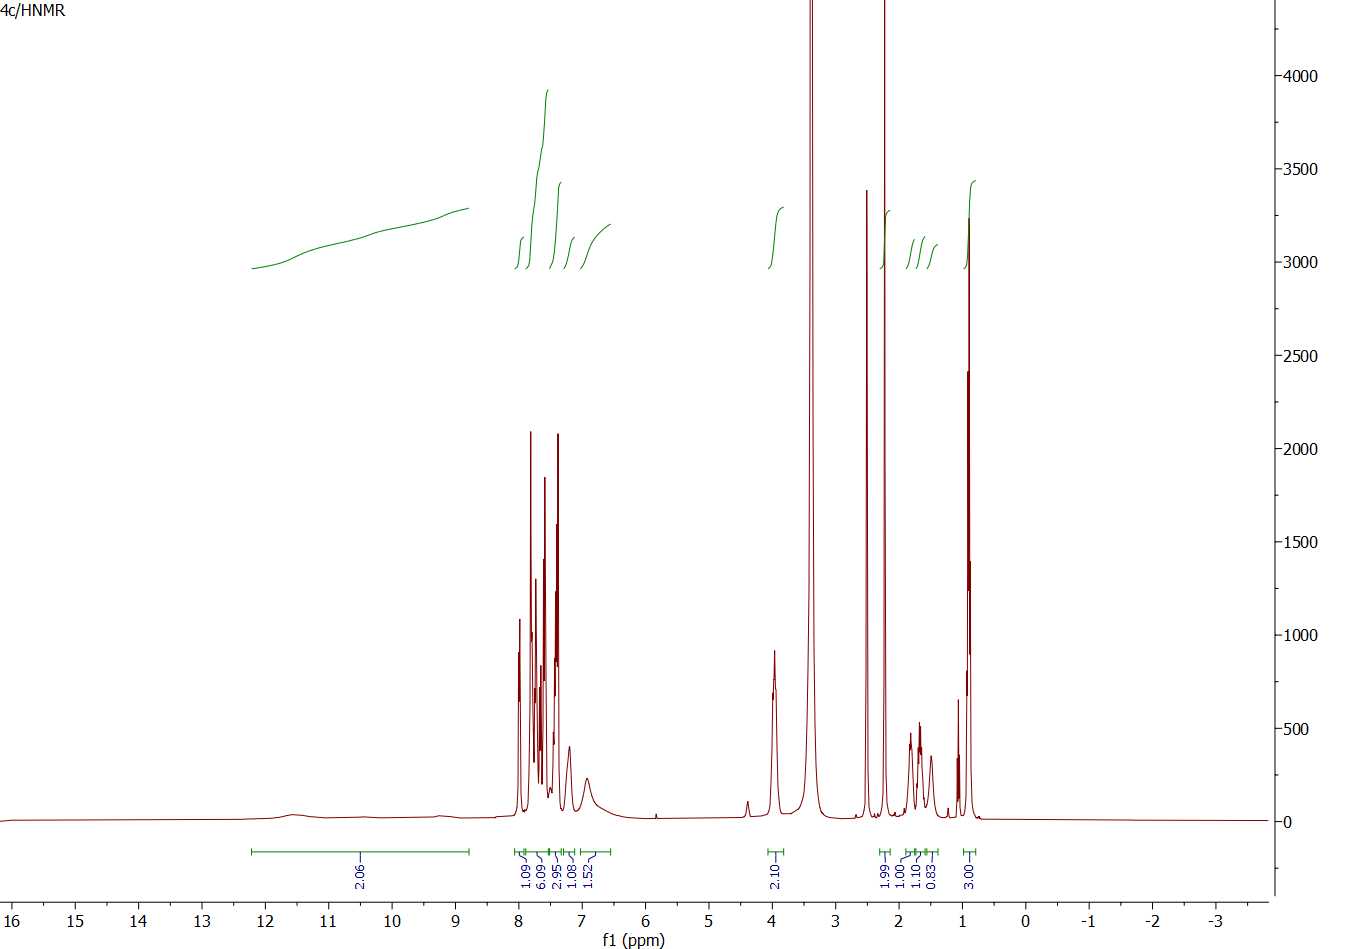


**Figure 7**: 1H-NMR spectrum of compound **4c**


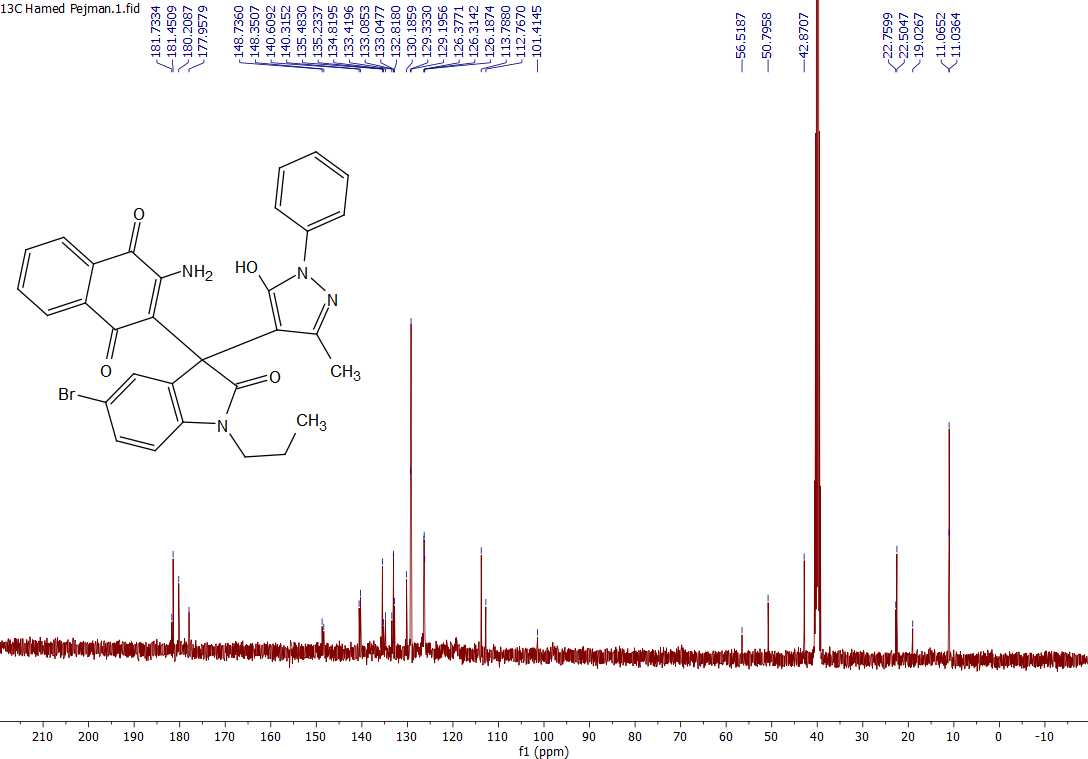


**Figure 8**: 13C-NMR spectrum of compound **4c**


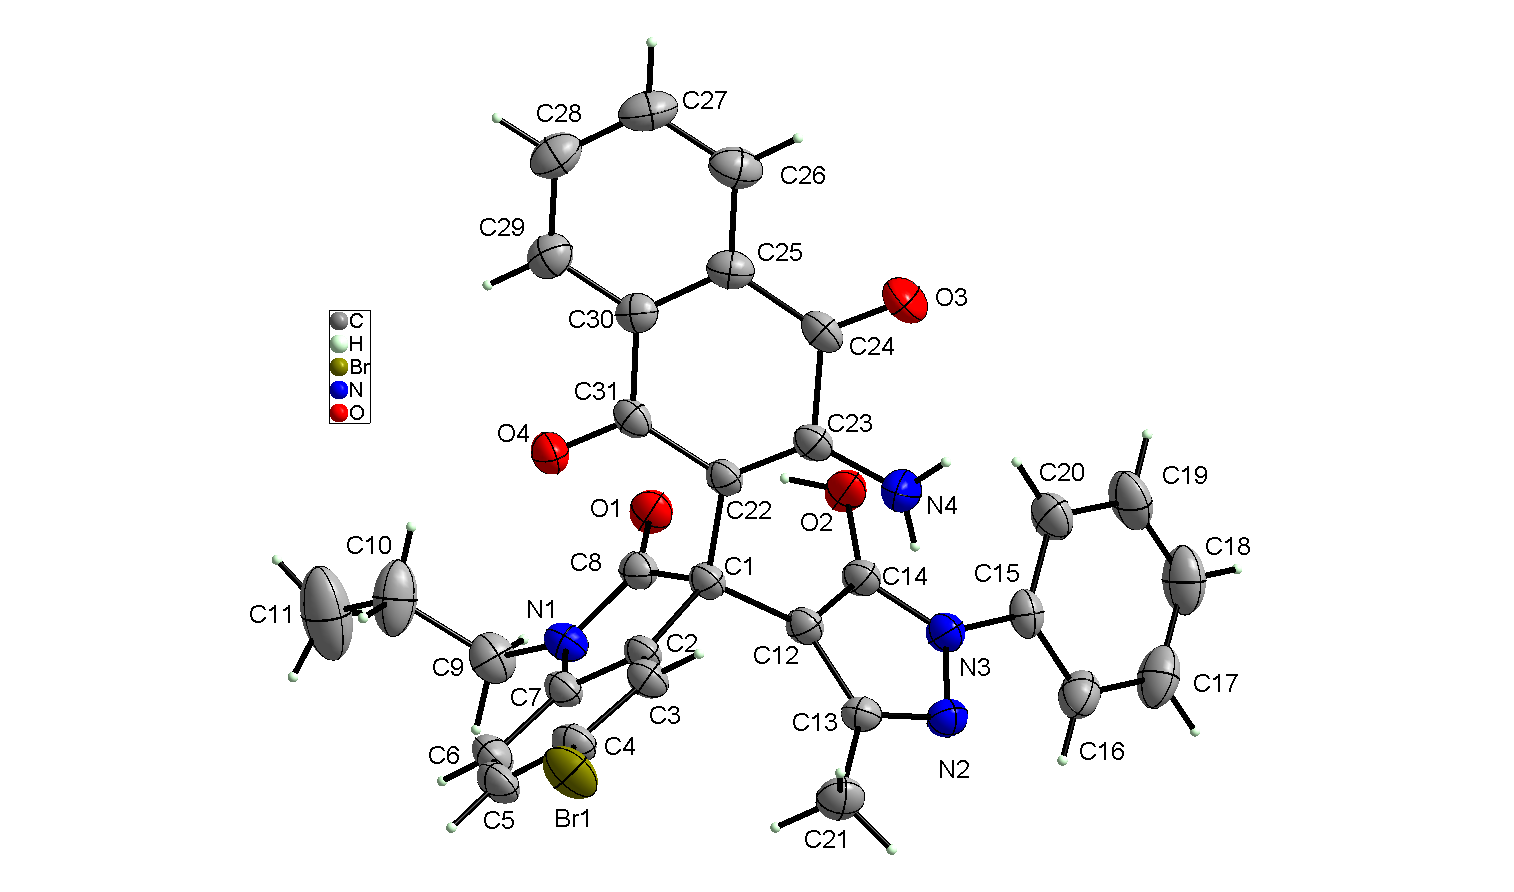


**Figure 9**: X-Ray spectrum of compound **4c**

**
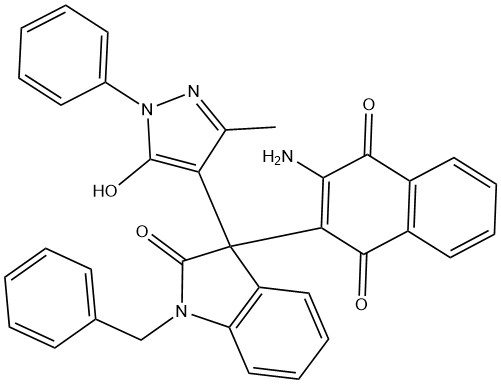
**


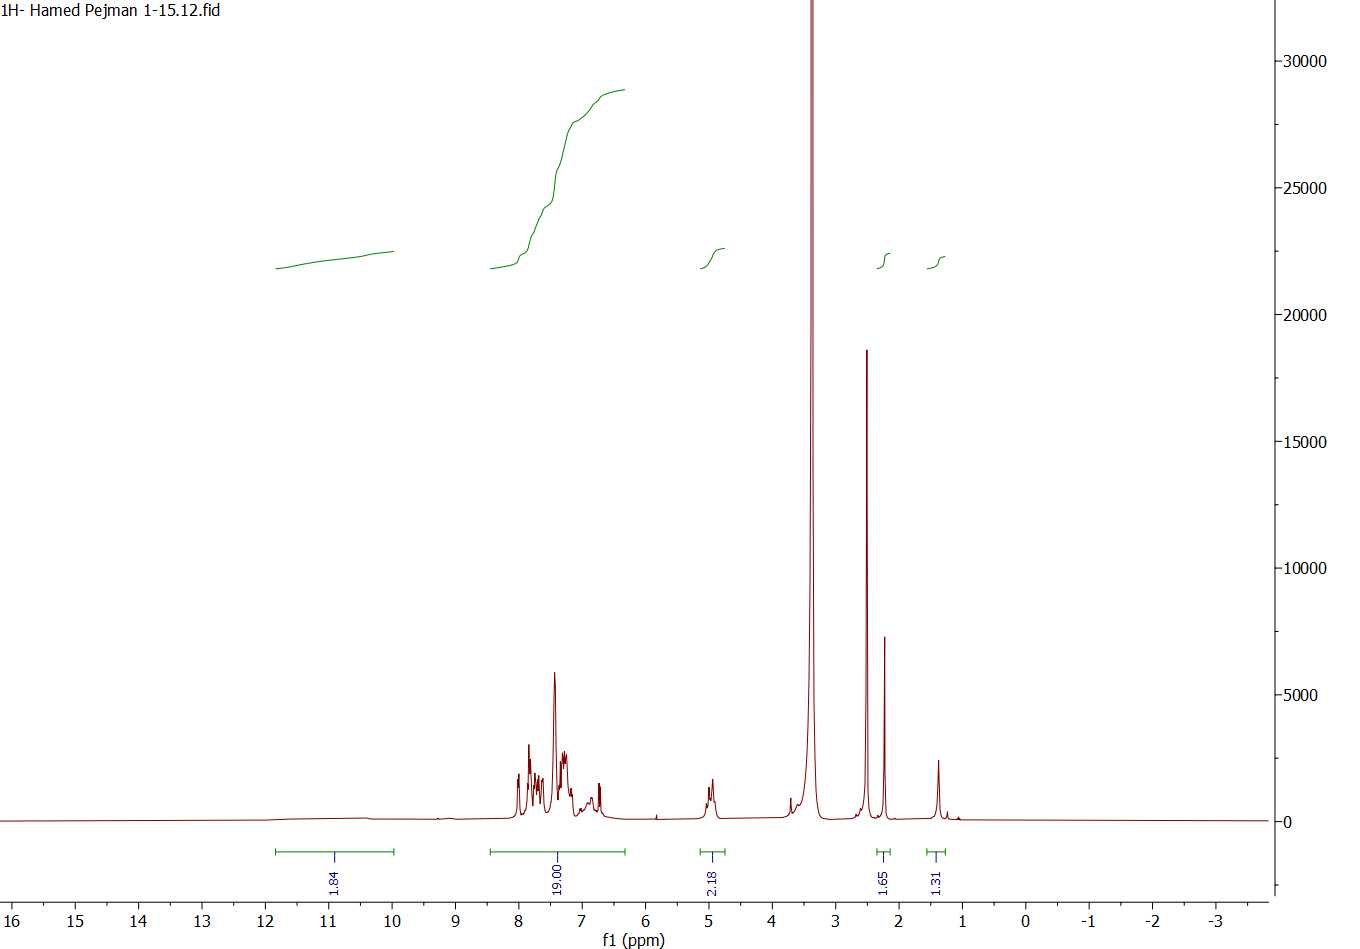


**Figure 10**: 1H-NMR spectrum of compound **4d**


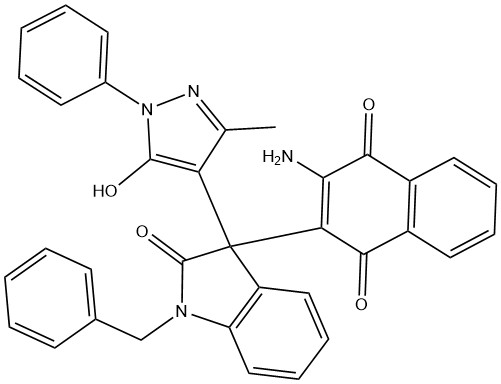

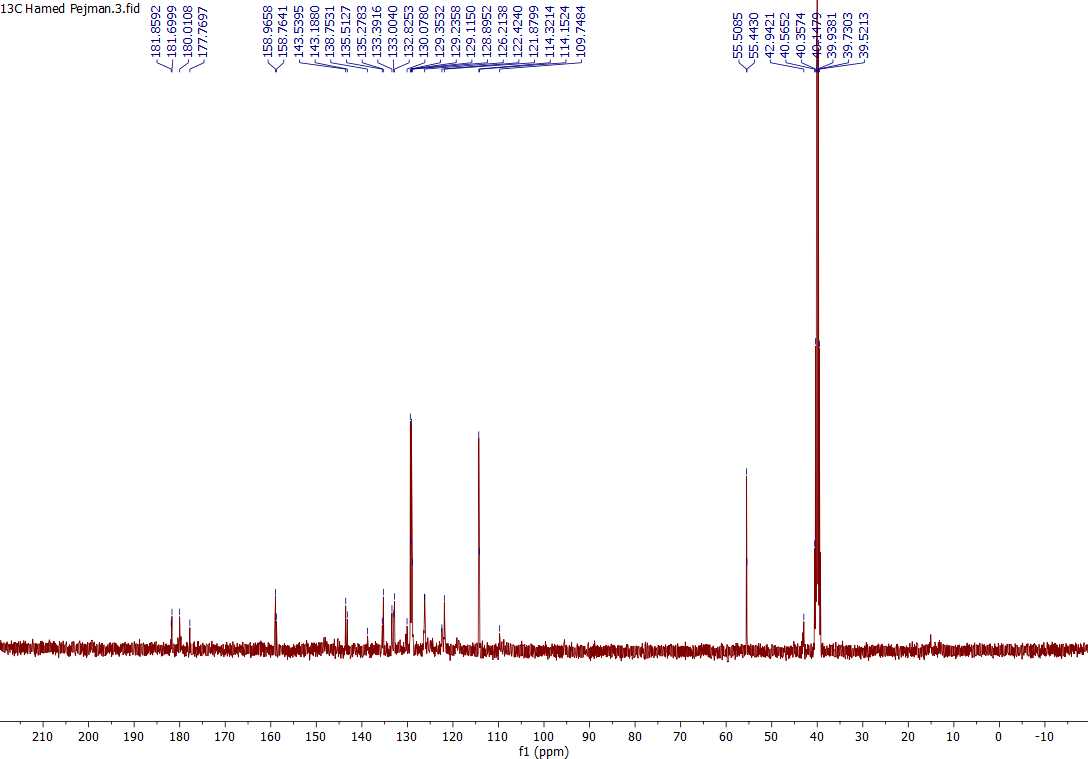


**Figure 11**: 13C-NMR spectrum of compound **4d**


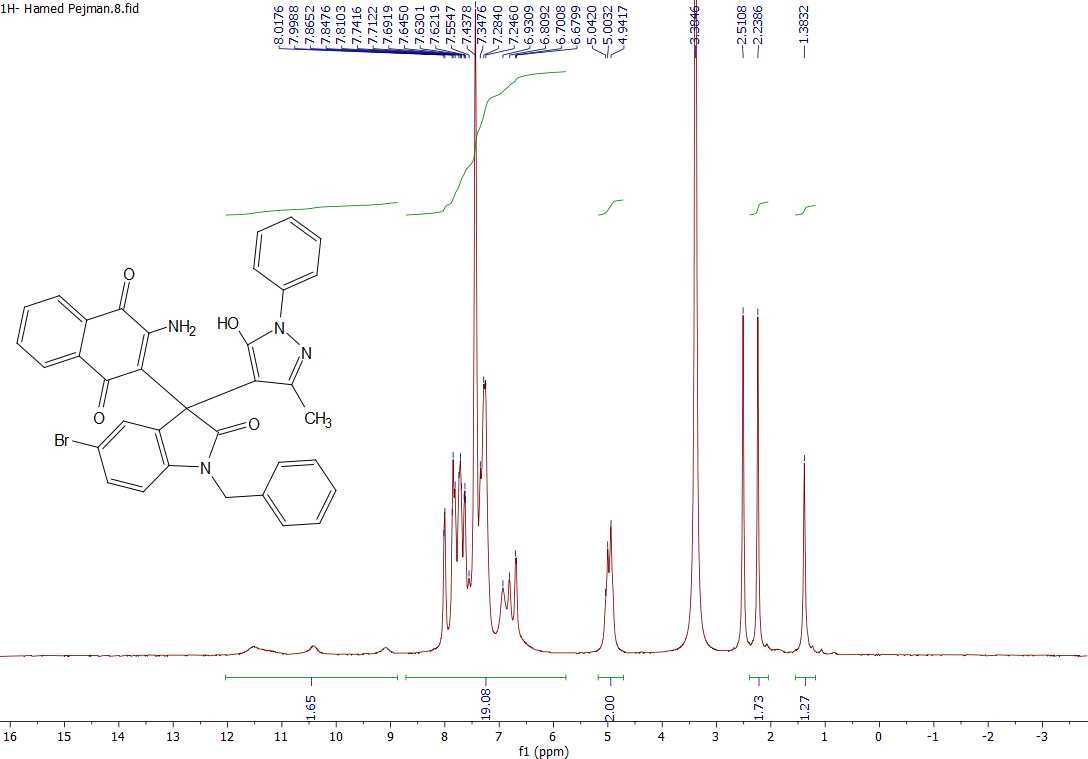


**Figure 12**: 1H-NMR spectrum of compound **4e**


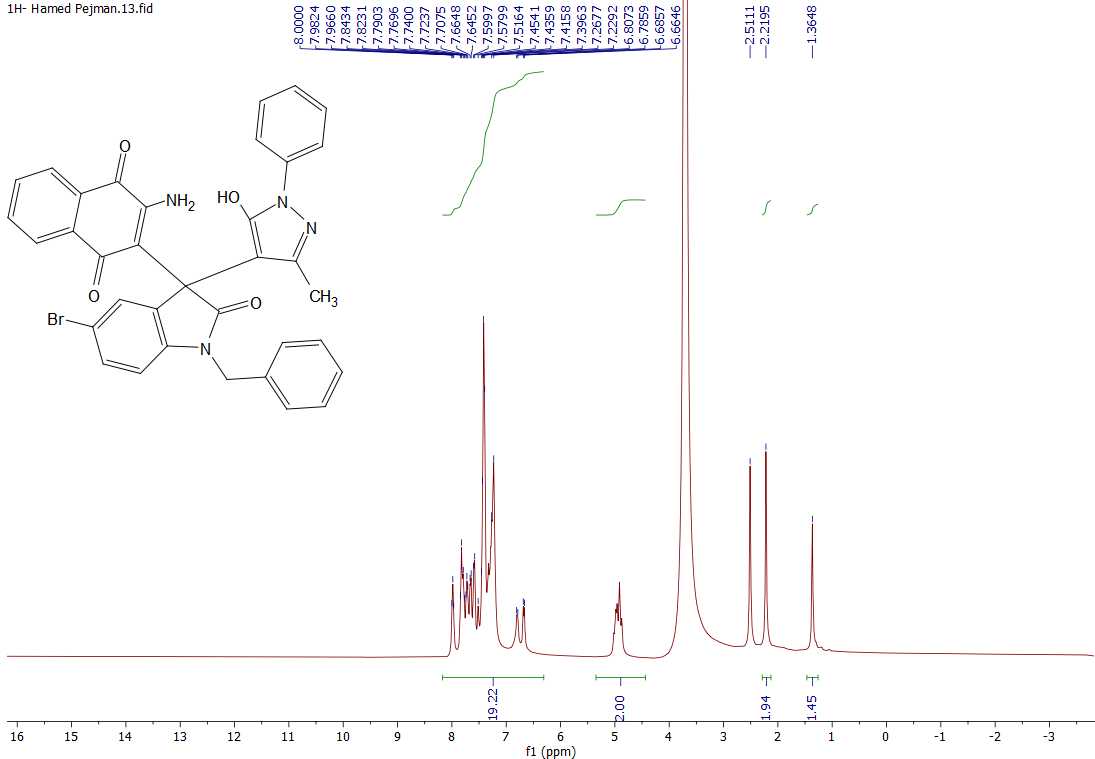


**Figure 13**: D2O spectrum of compound **4e**


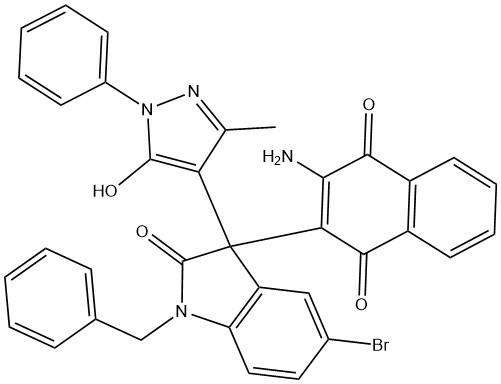

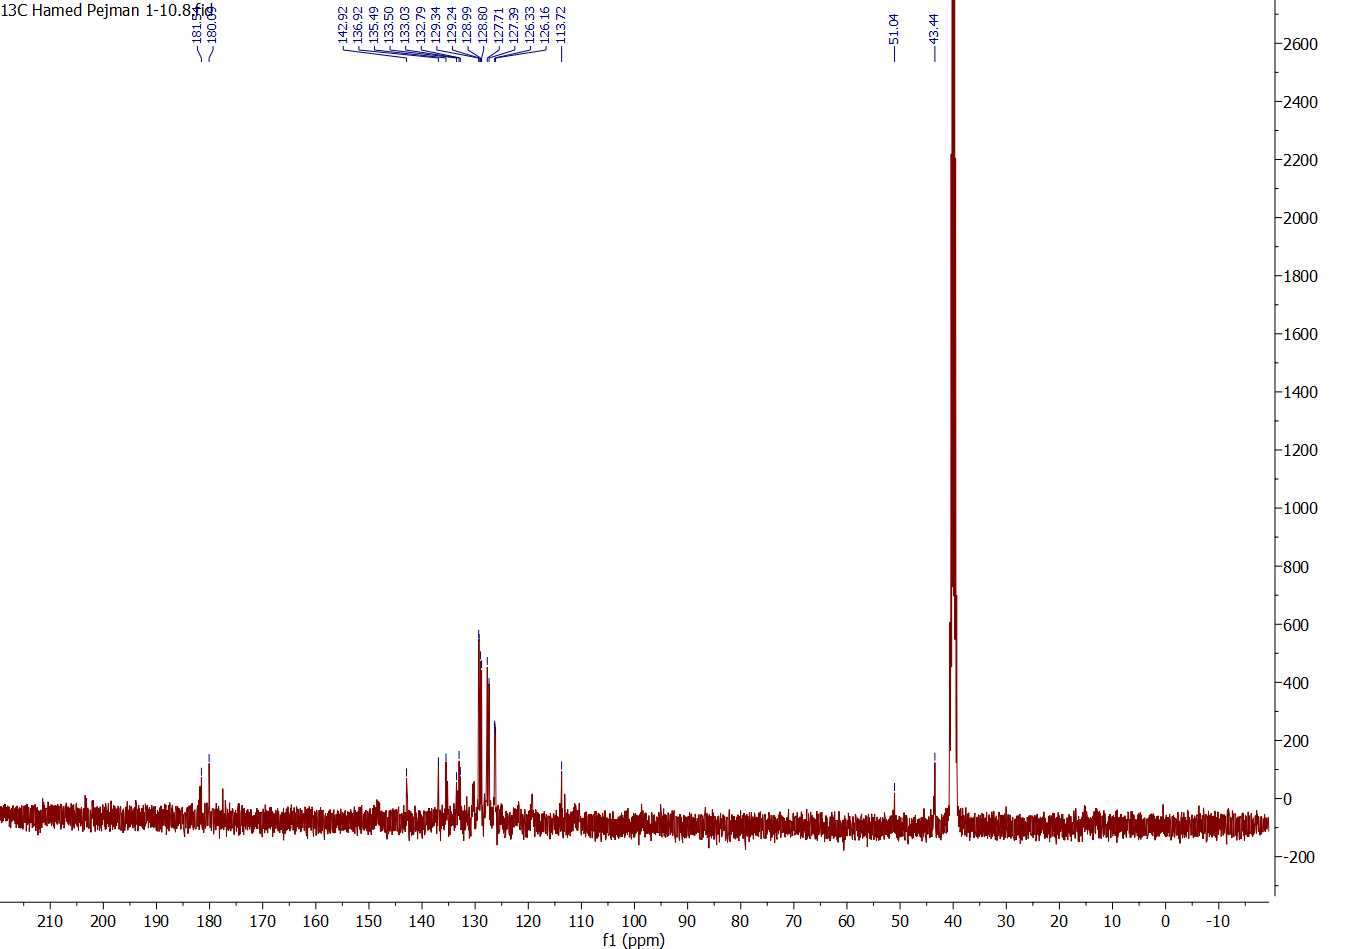


**Figure 14**: 13C-NMR spectrum of compound **4e**


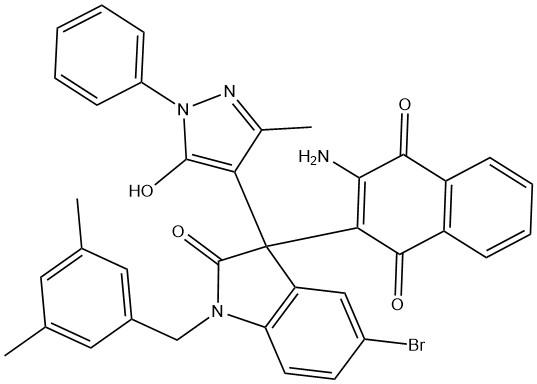


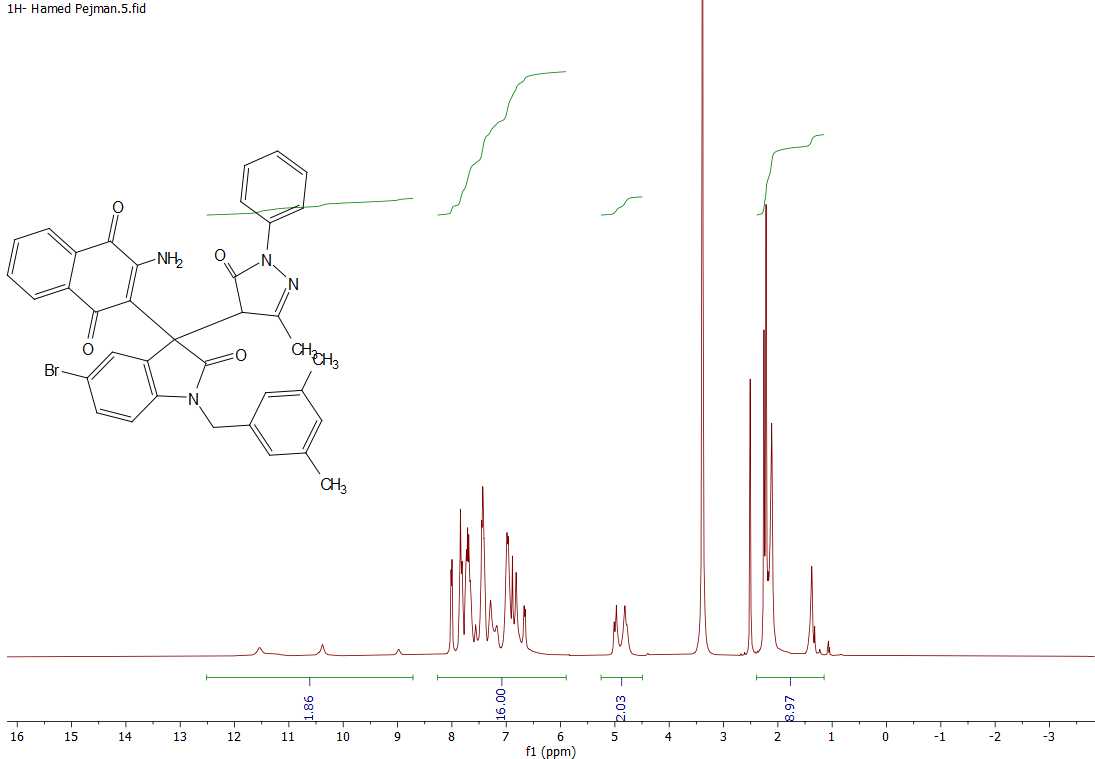


**Figure 15**: 1H-NMR spectrum of compound **4f**


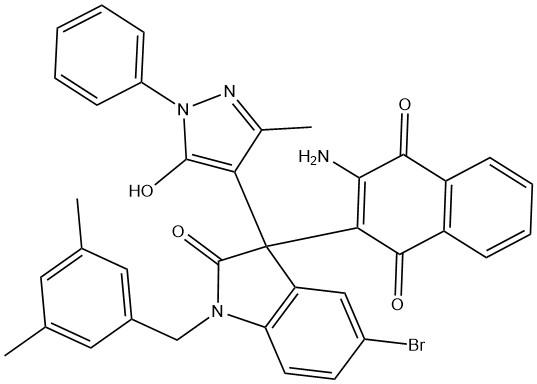


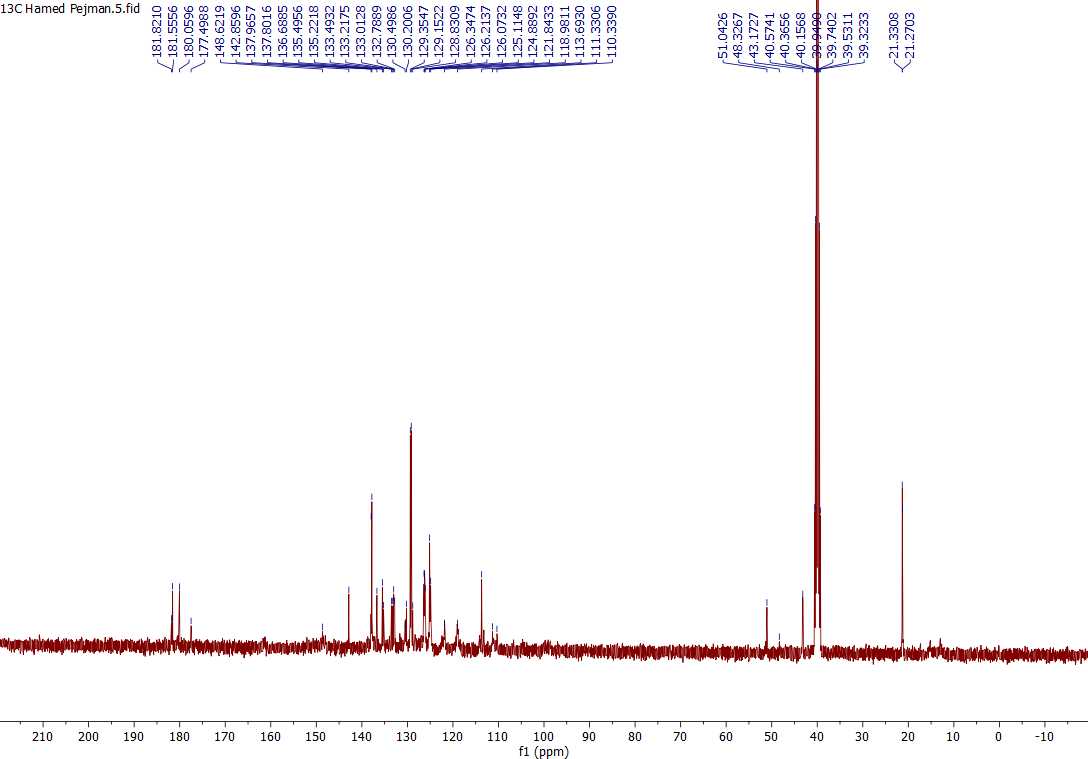


**Figure 16**: 13C-NMR spectrum of compound **4f**


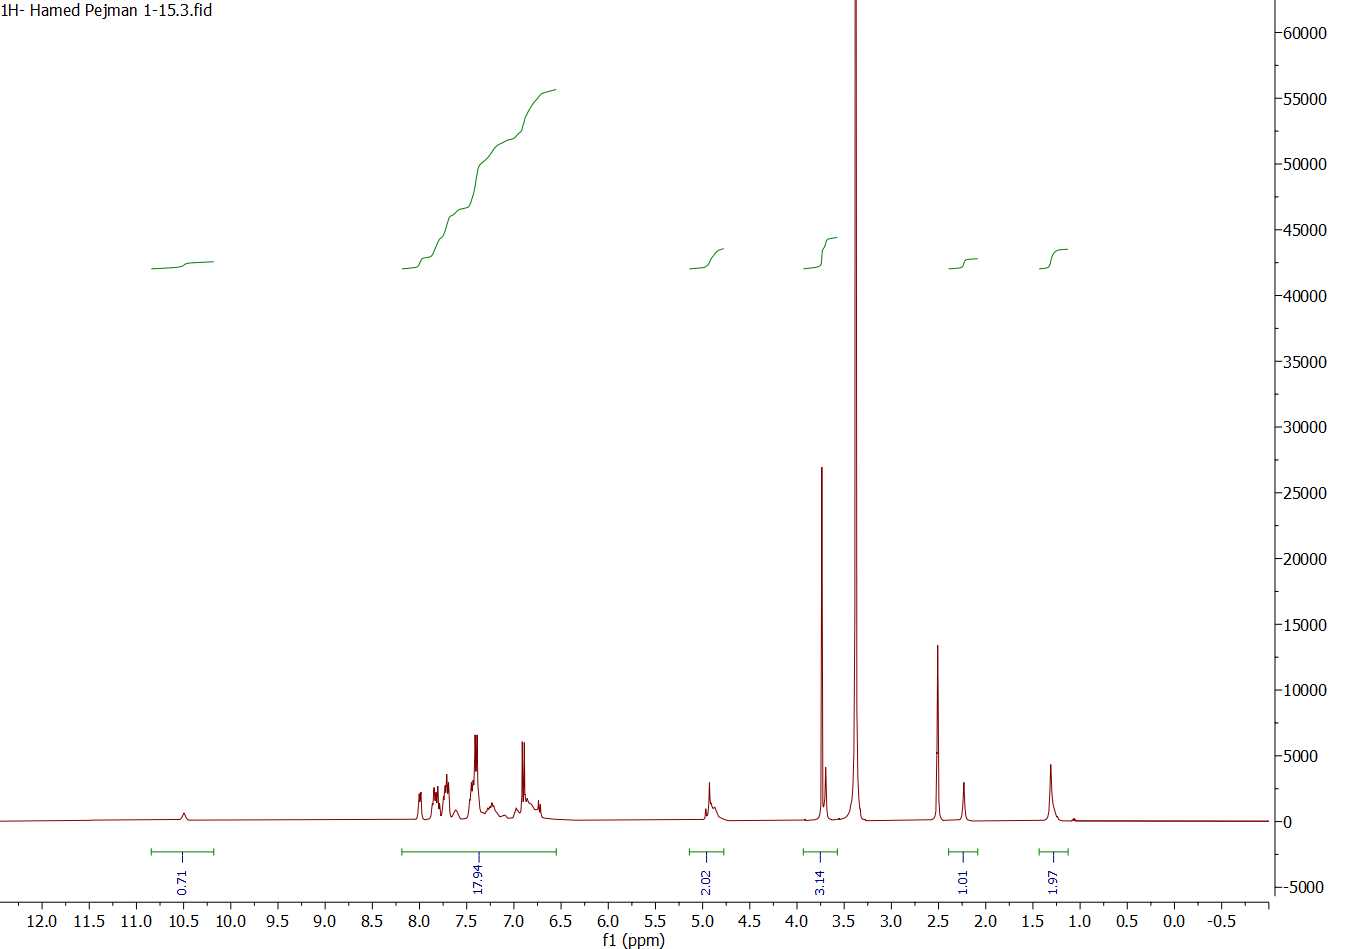

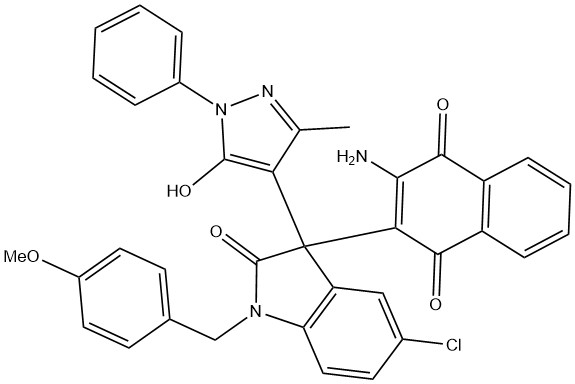


**Figure 17**: 1H-NMR spectrum of compound **4g**


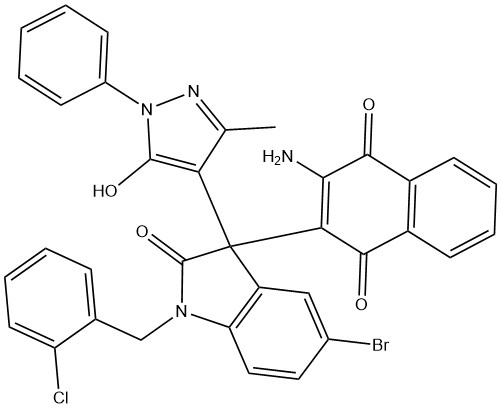

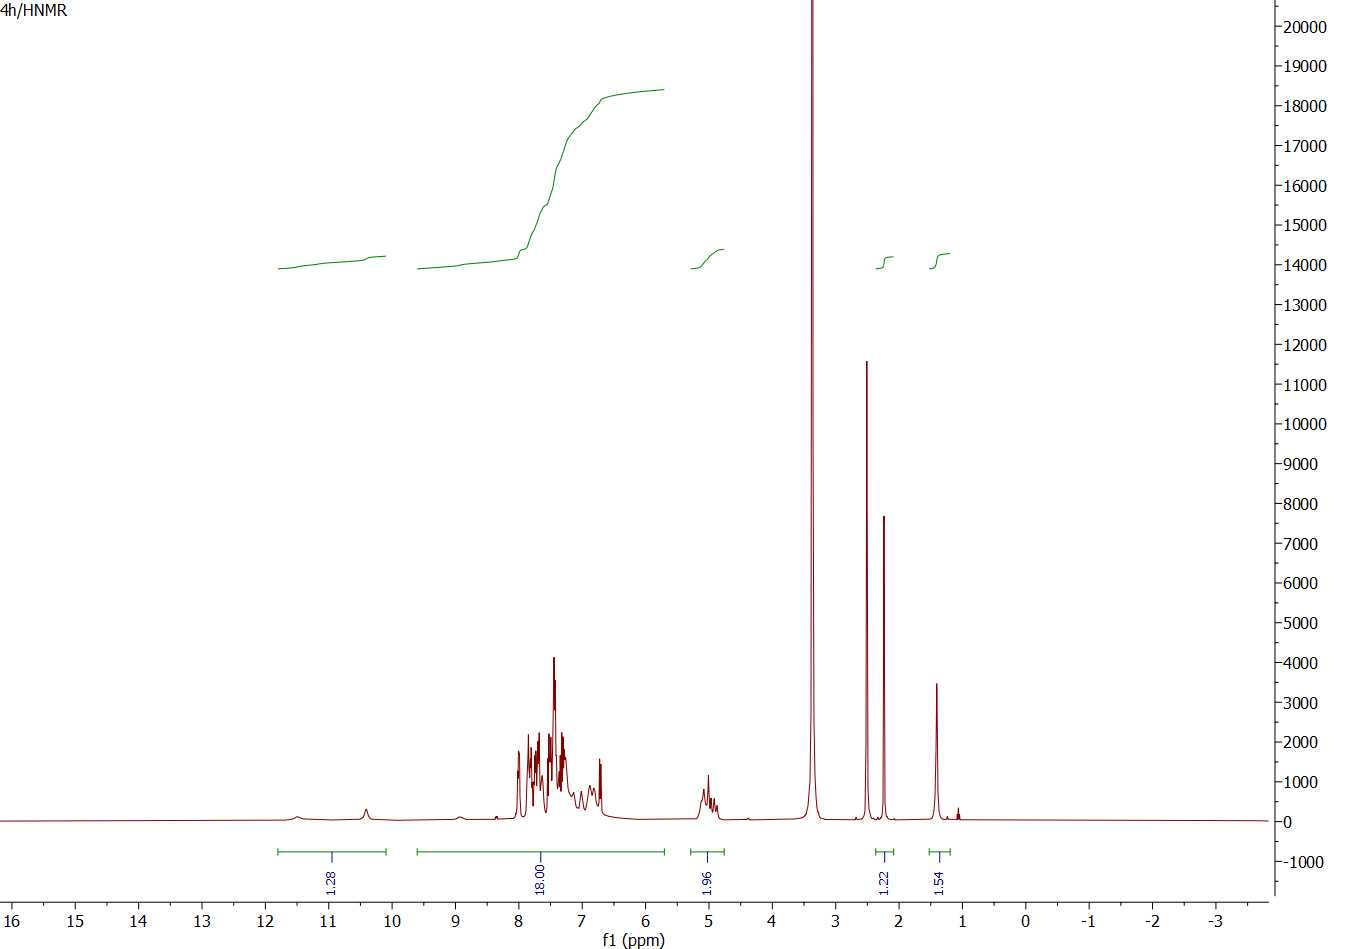


**Figure 18**: 1H-NMR spectrum of compound **4h**


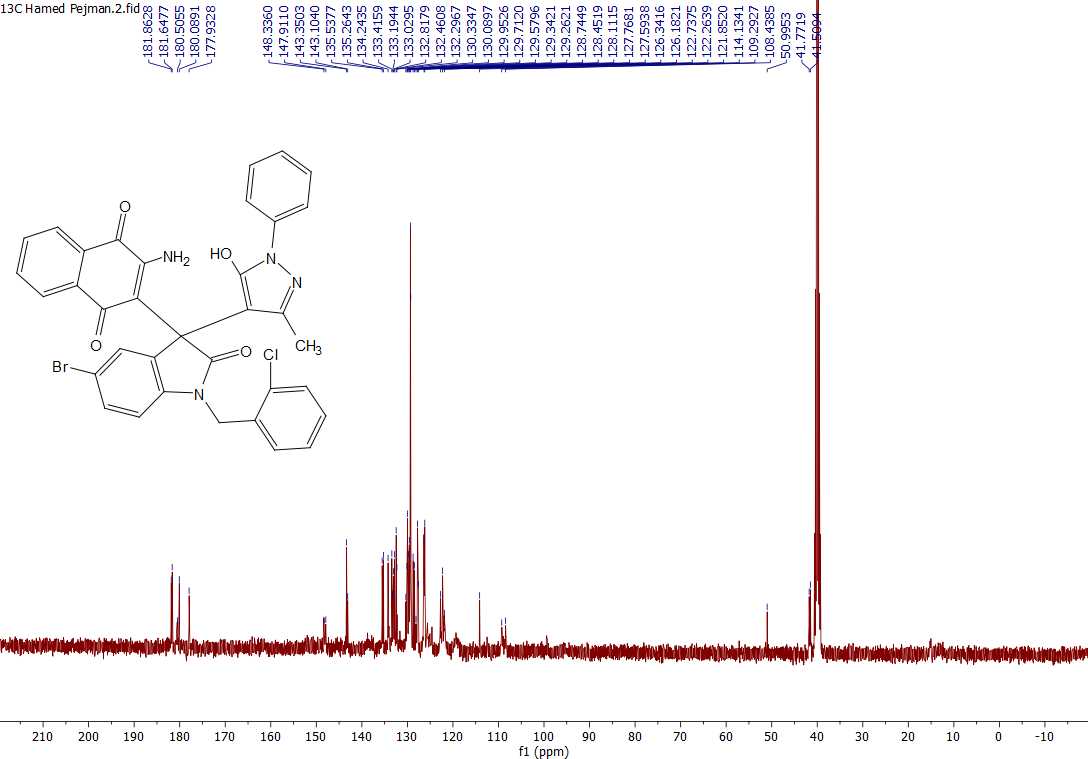


**Figure 19**: 13C-NMR spectrum of compound **4h**


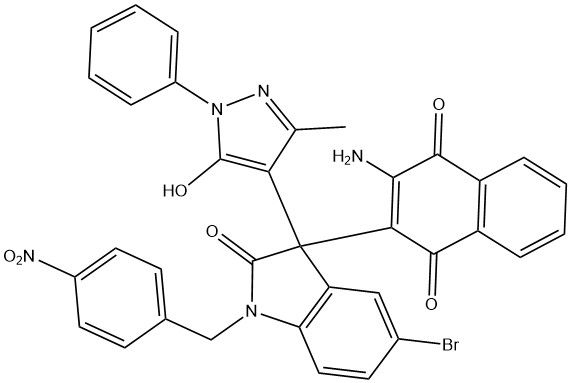

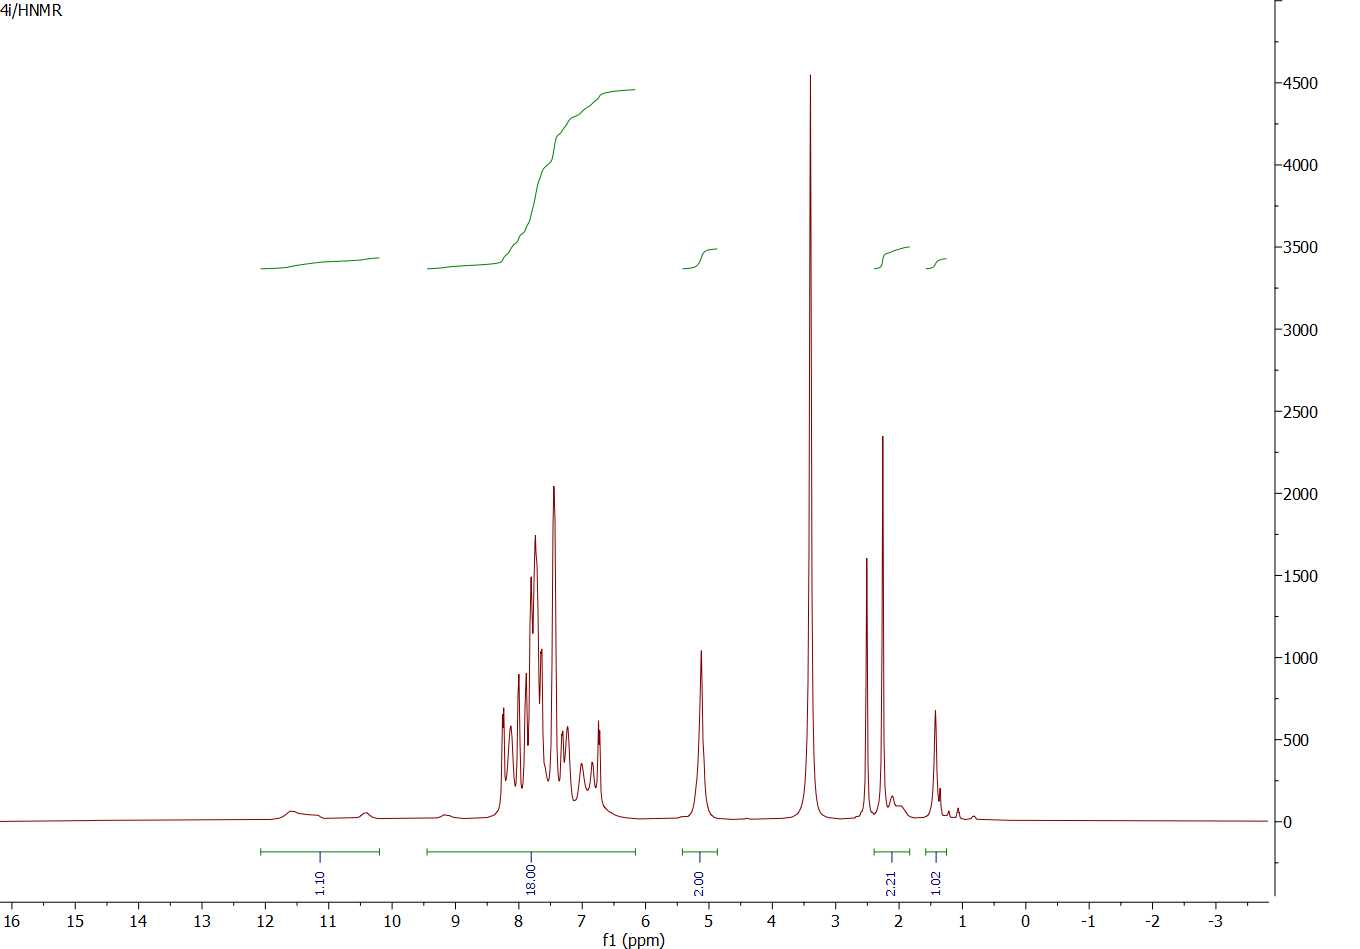


**Figure 20**: 1H-NMR spectrum of compound **4i**


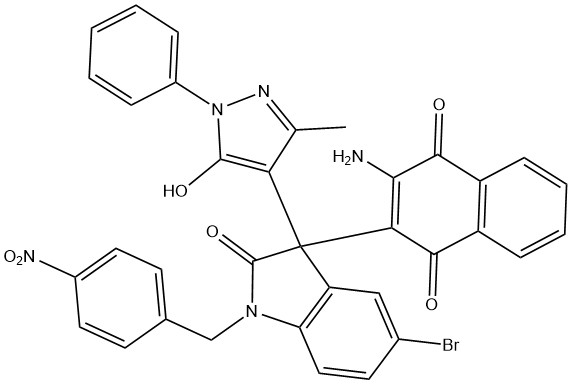

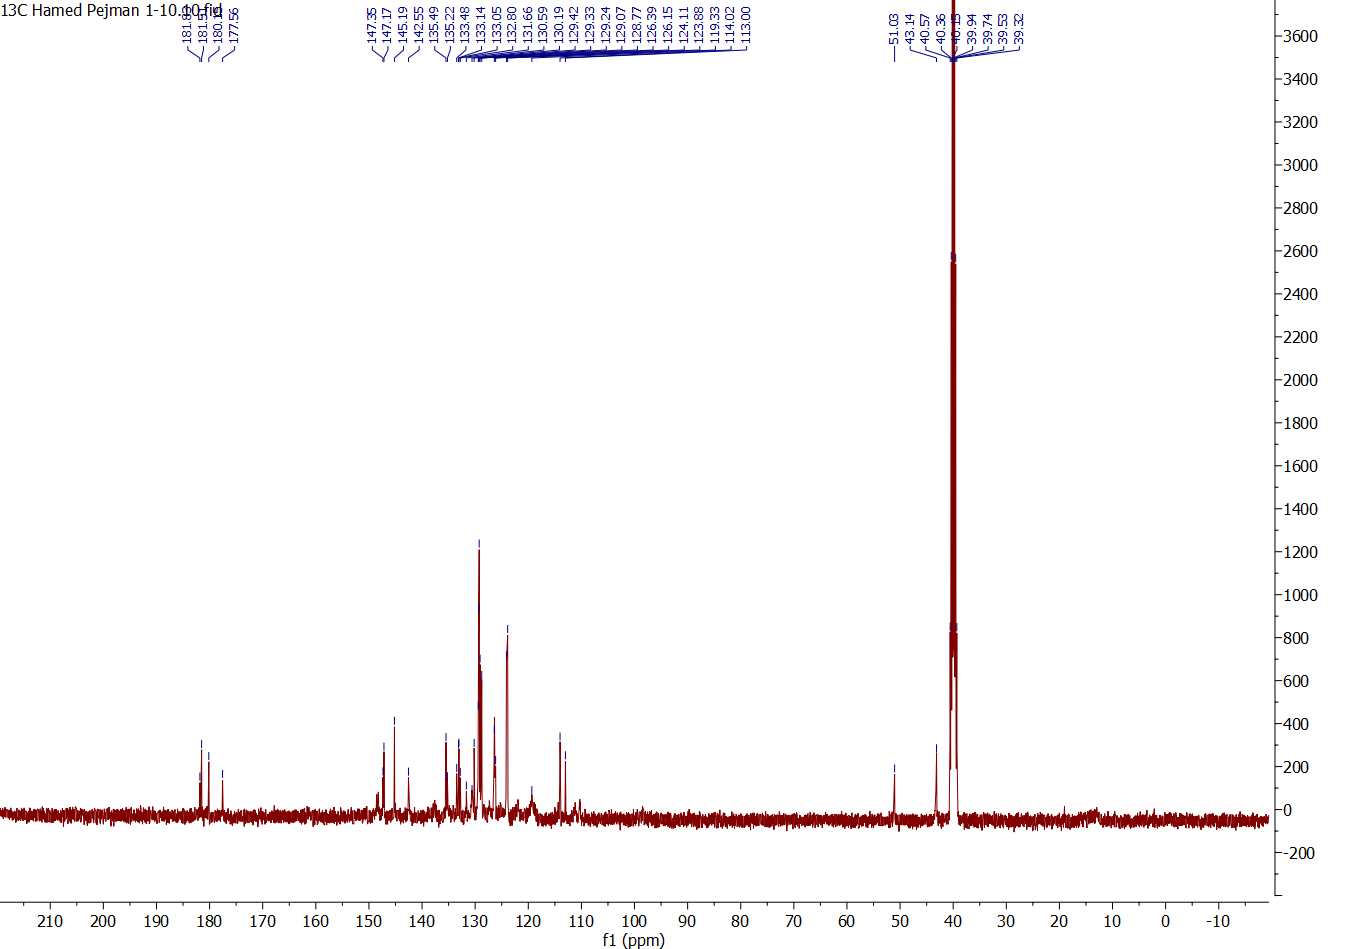


**Figure 21**: 13C-NMR spectrum of compound **4i**

**
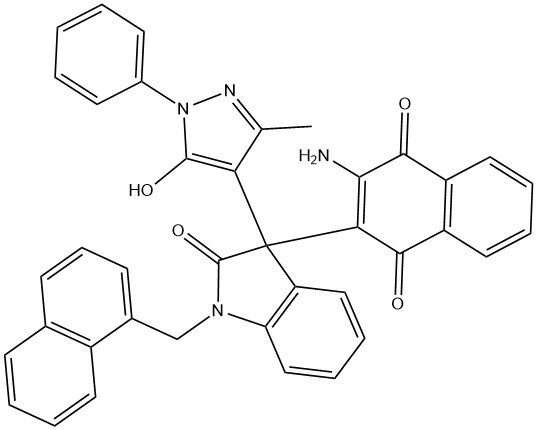
**


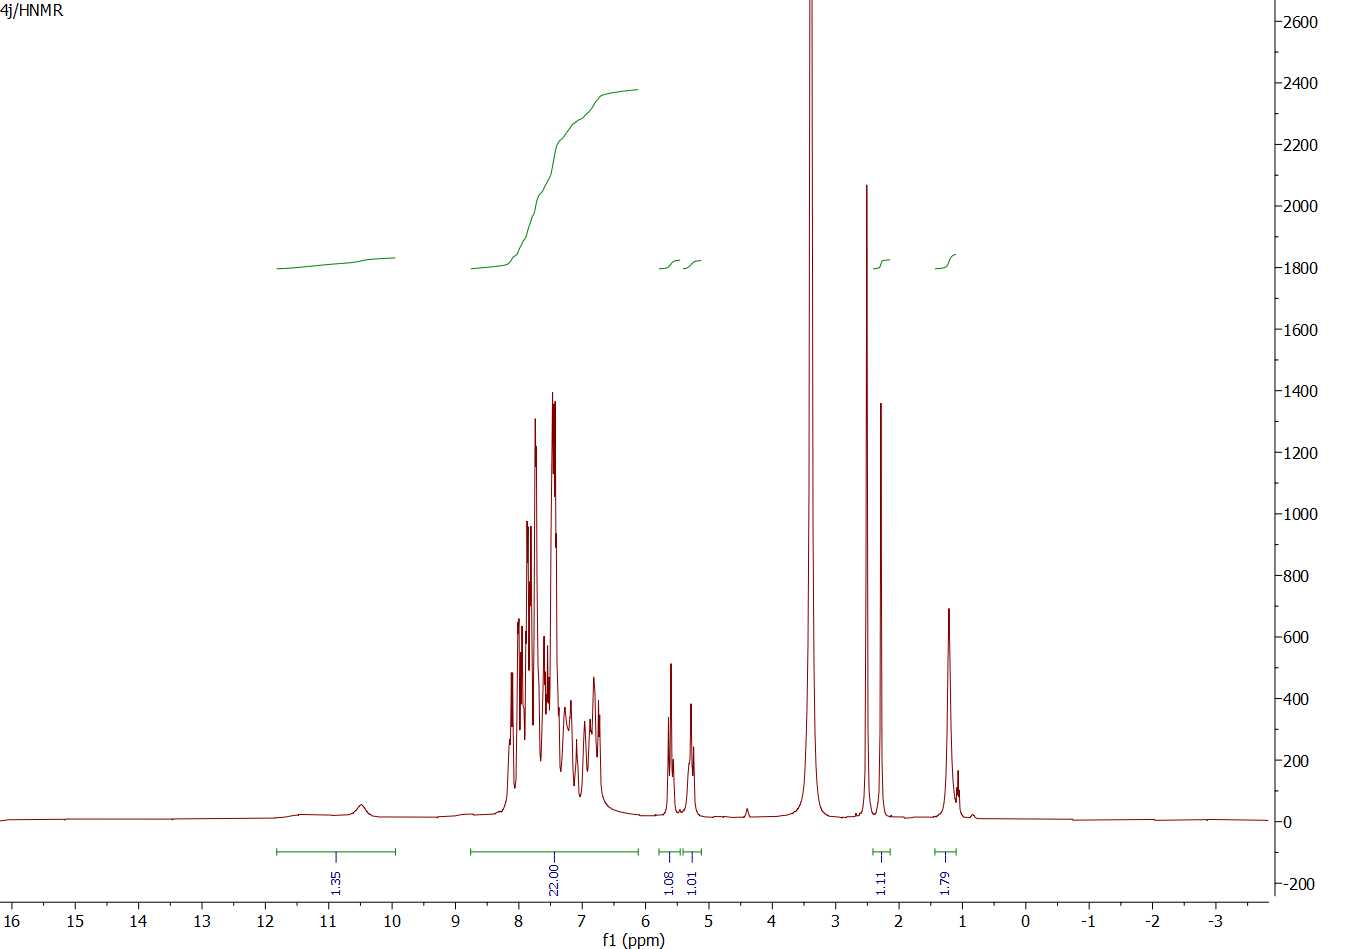


**Figure 22**: 1H-NMR spectrum of compound **4j**

**
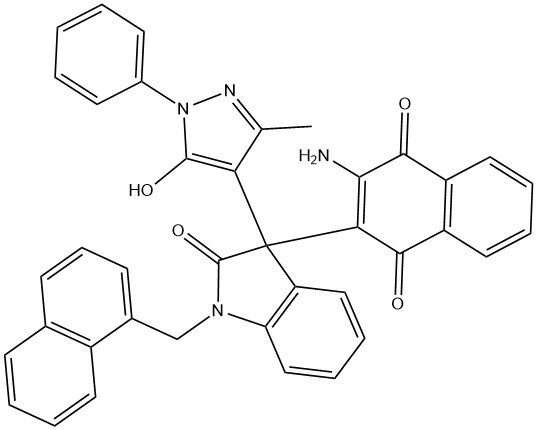
**


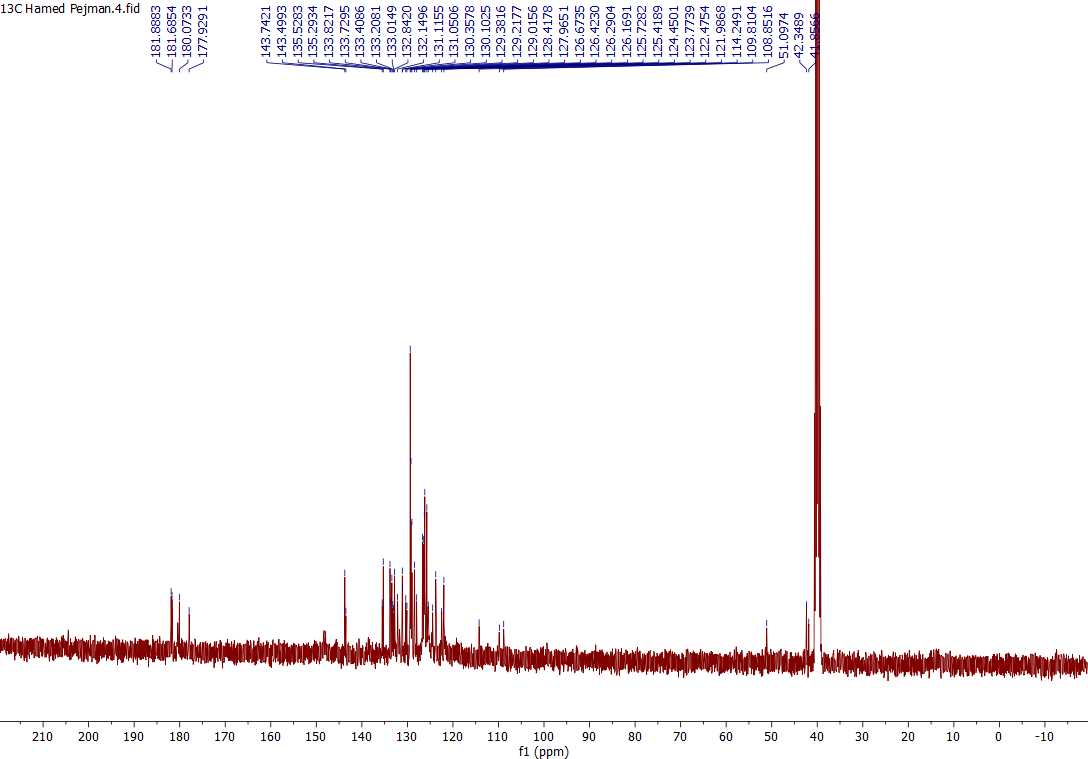


**Figure 23**: 13C-NMR spectrum of compound **4j**


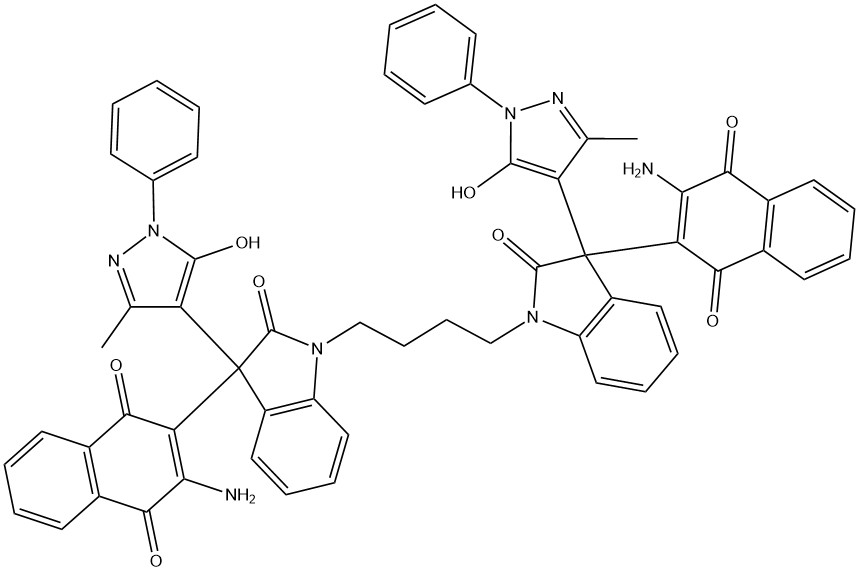

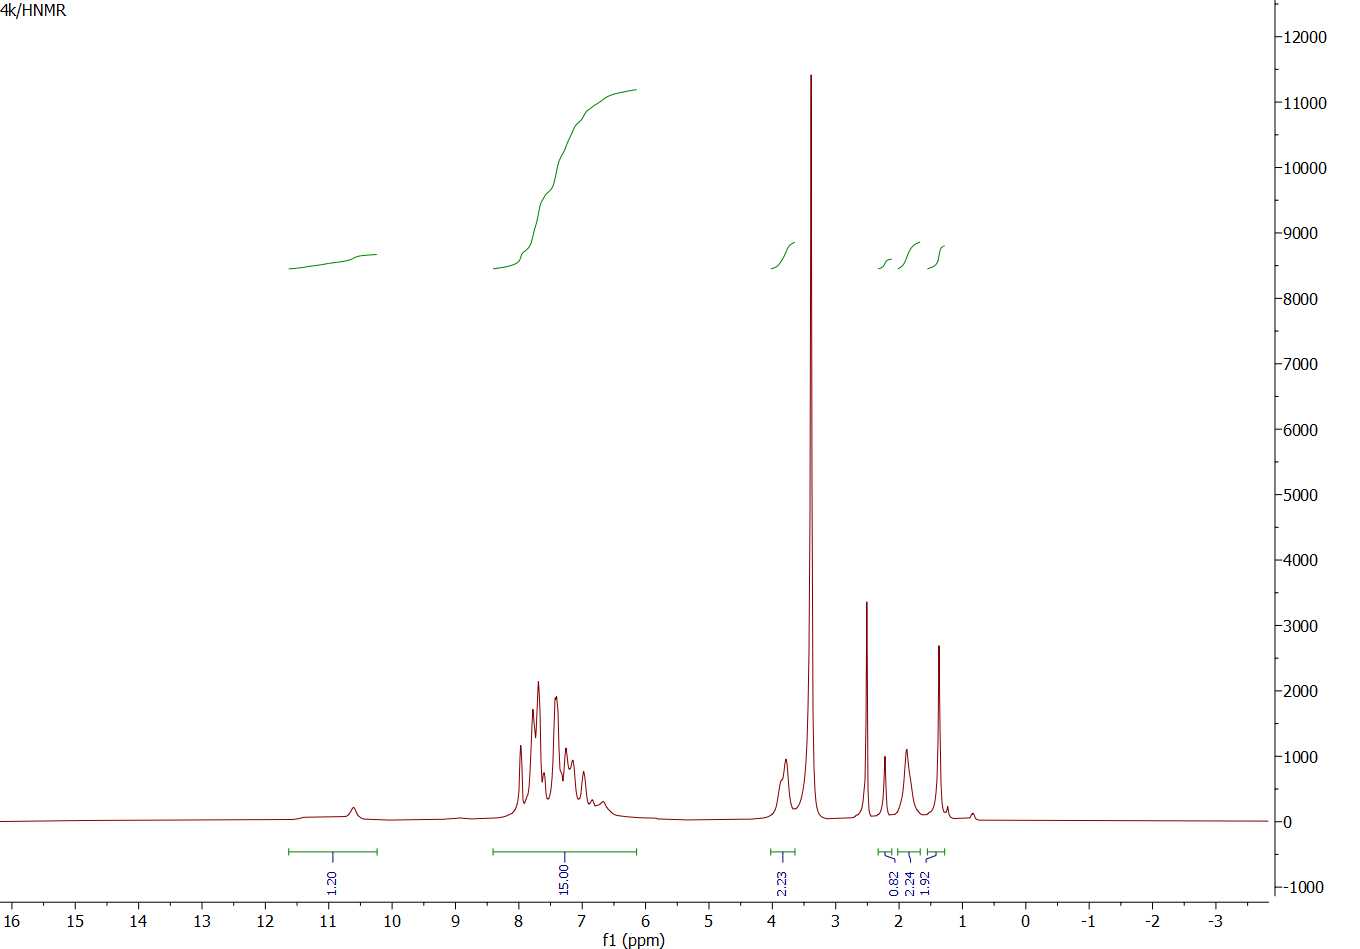


**Figure 24**: 1H-NMR spectrum of compound **4k**


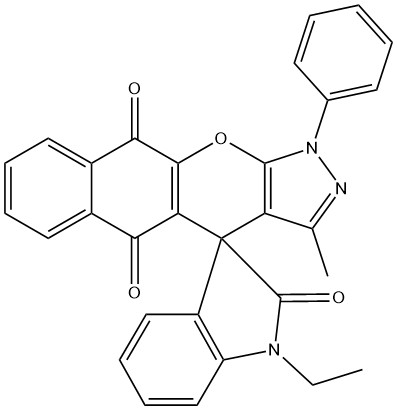

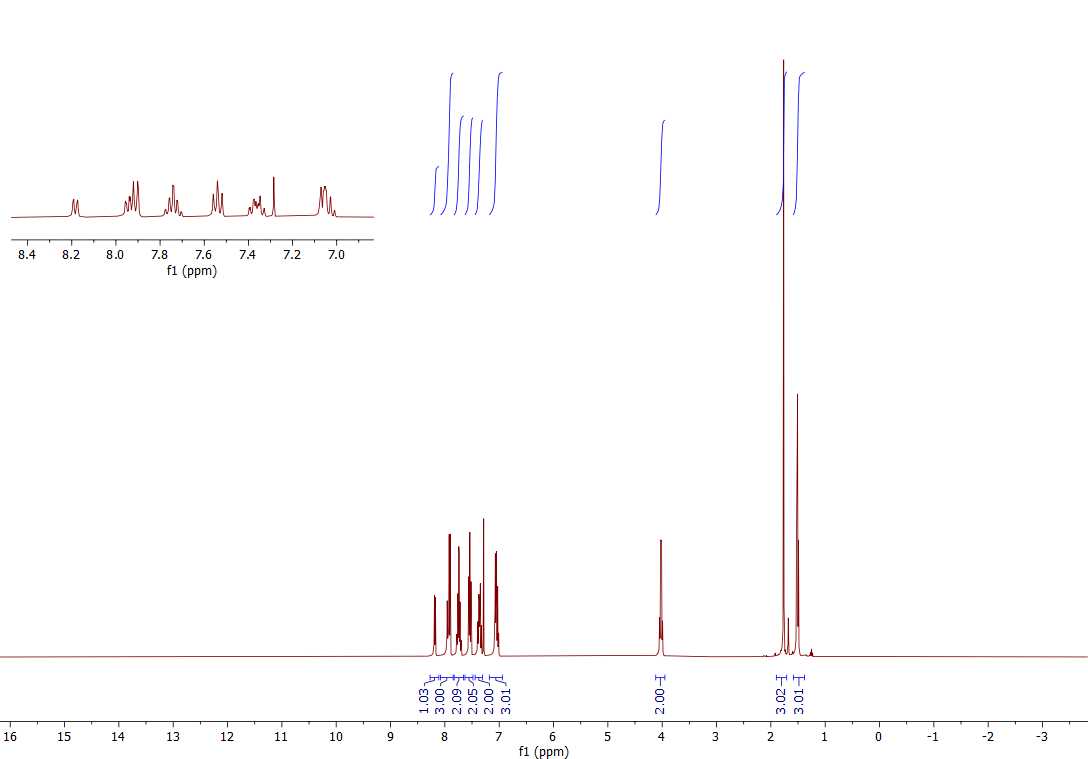


**Figure 25**: 1H-NMR spectrum of compound **5a**

**
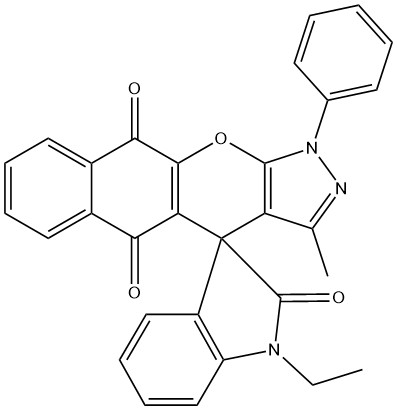
**


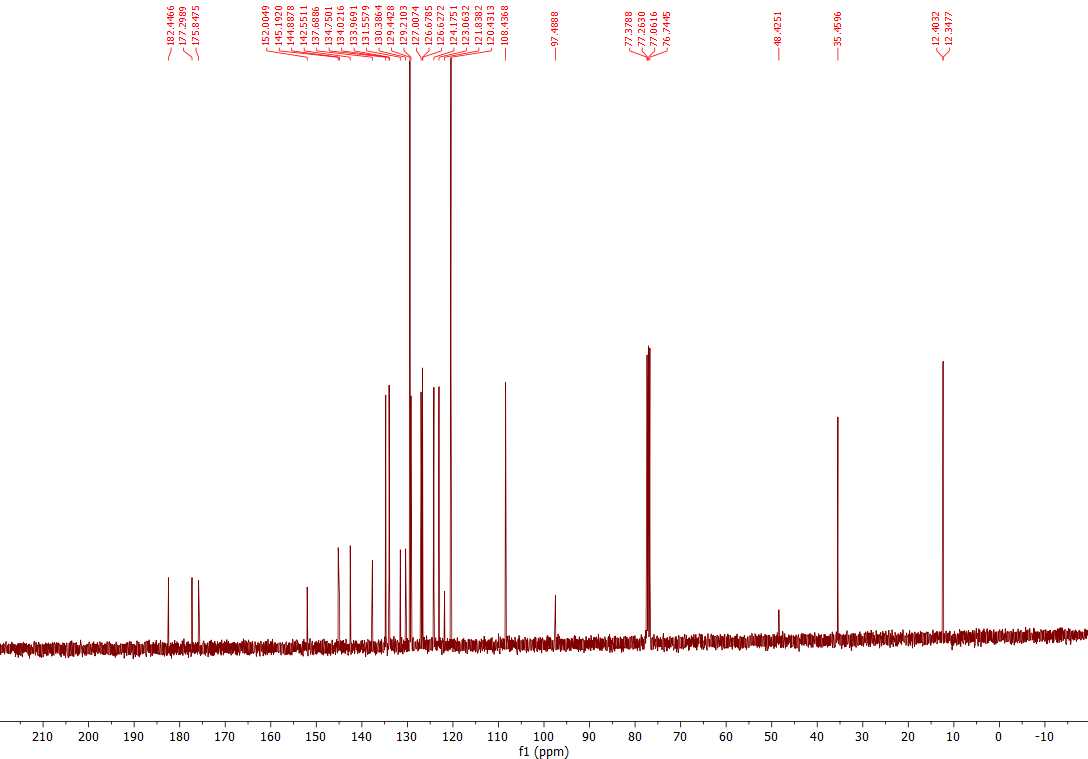


**Figure 26**: 13C-NMR spectrum of compound **5a**


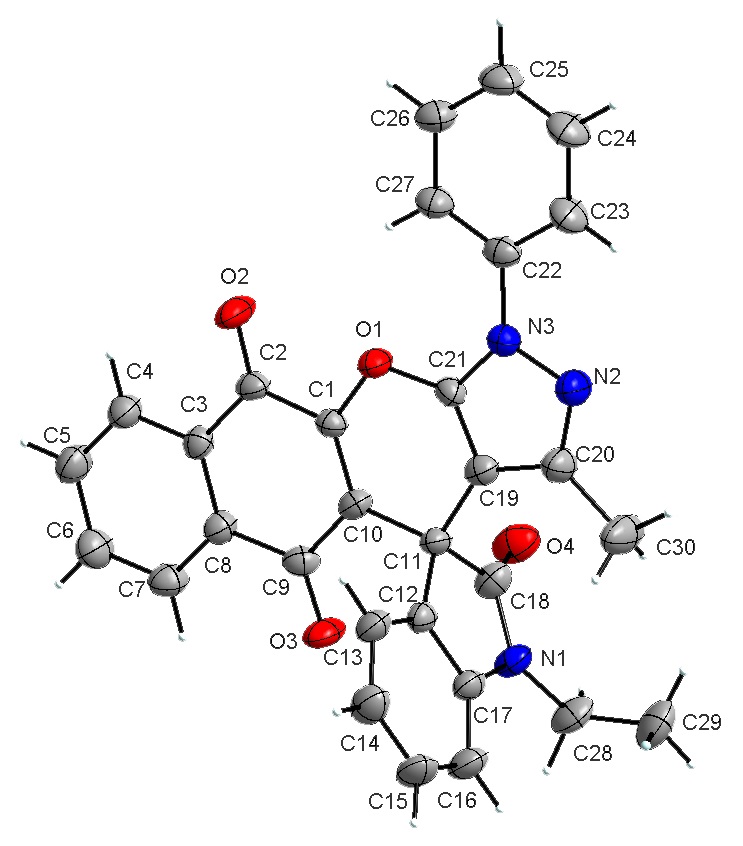


**Figure 27**: X-Ray spectrum of compound **5a**


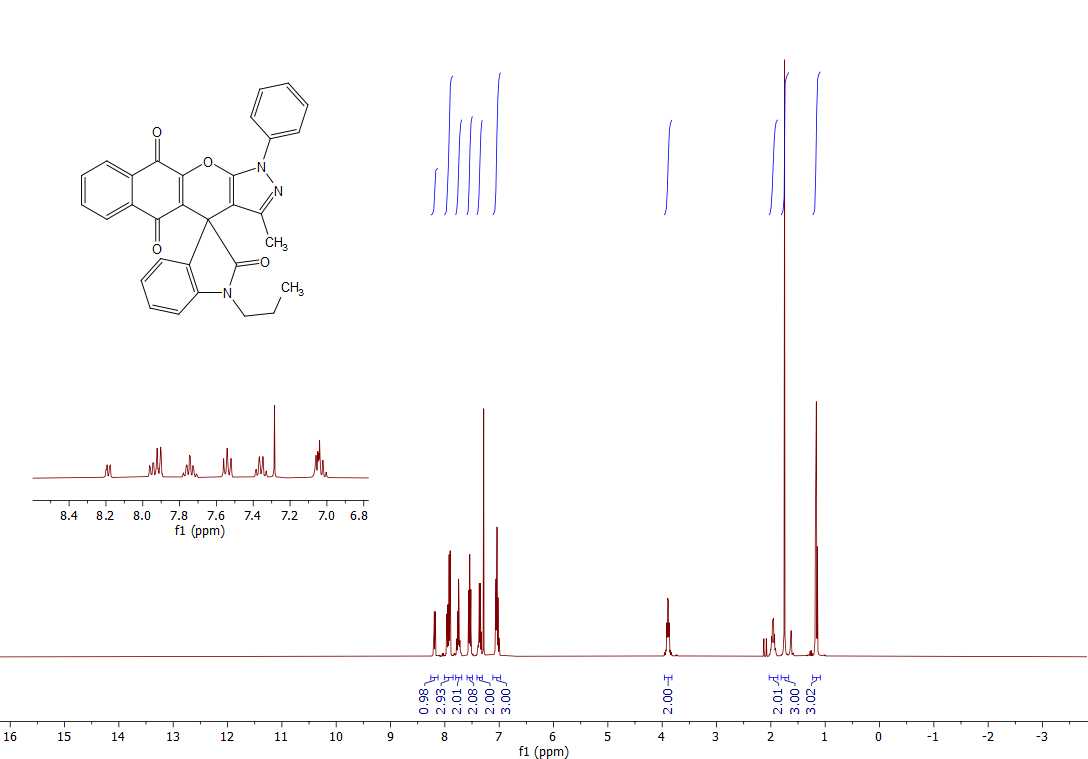


**Figure 28**: 1H-NMR spectrum of compound **5b**


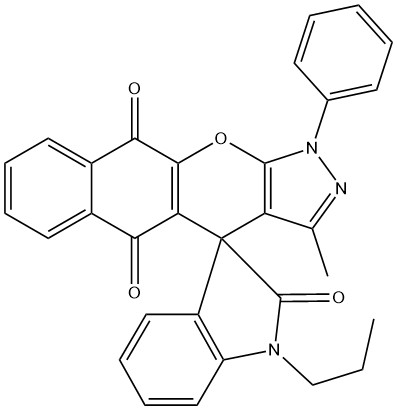

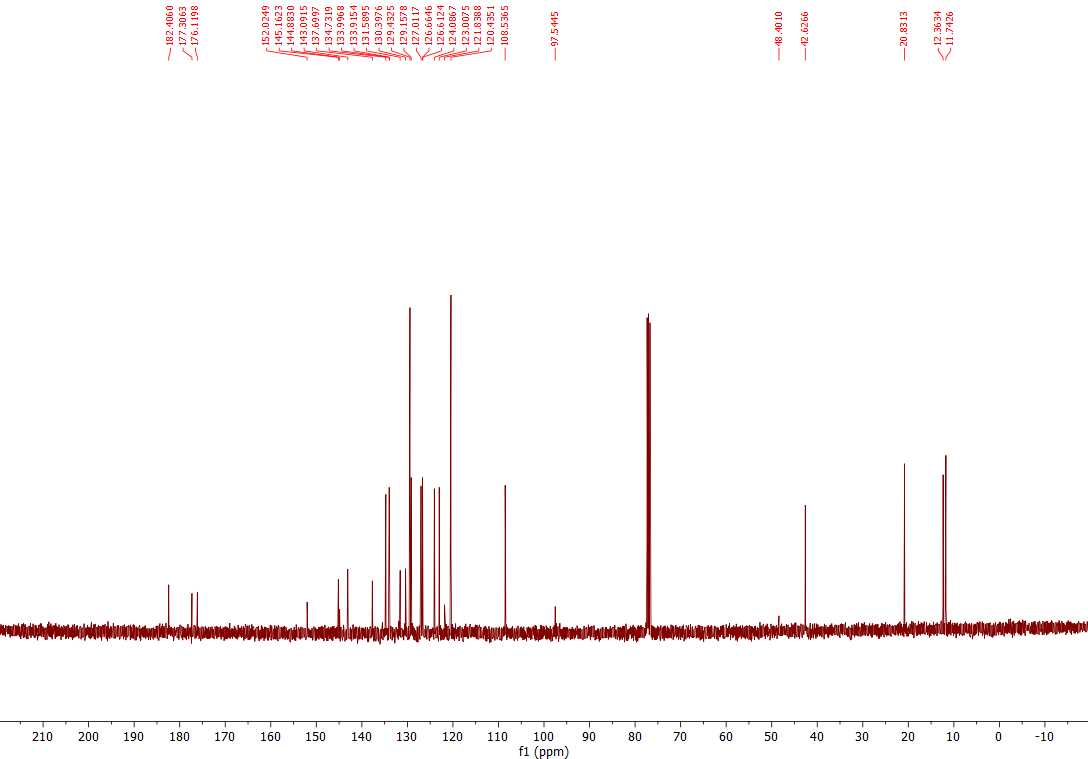


**Figure 29**: 13C-NMR spectrum of compound **5b**


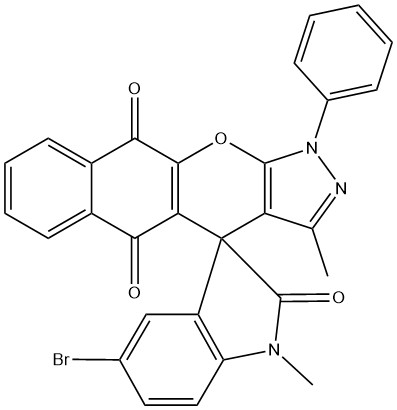

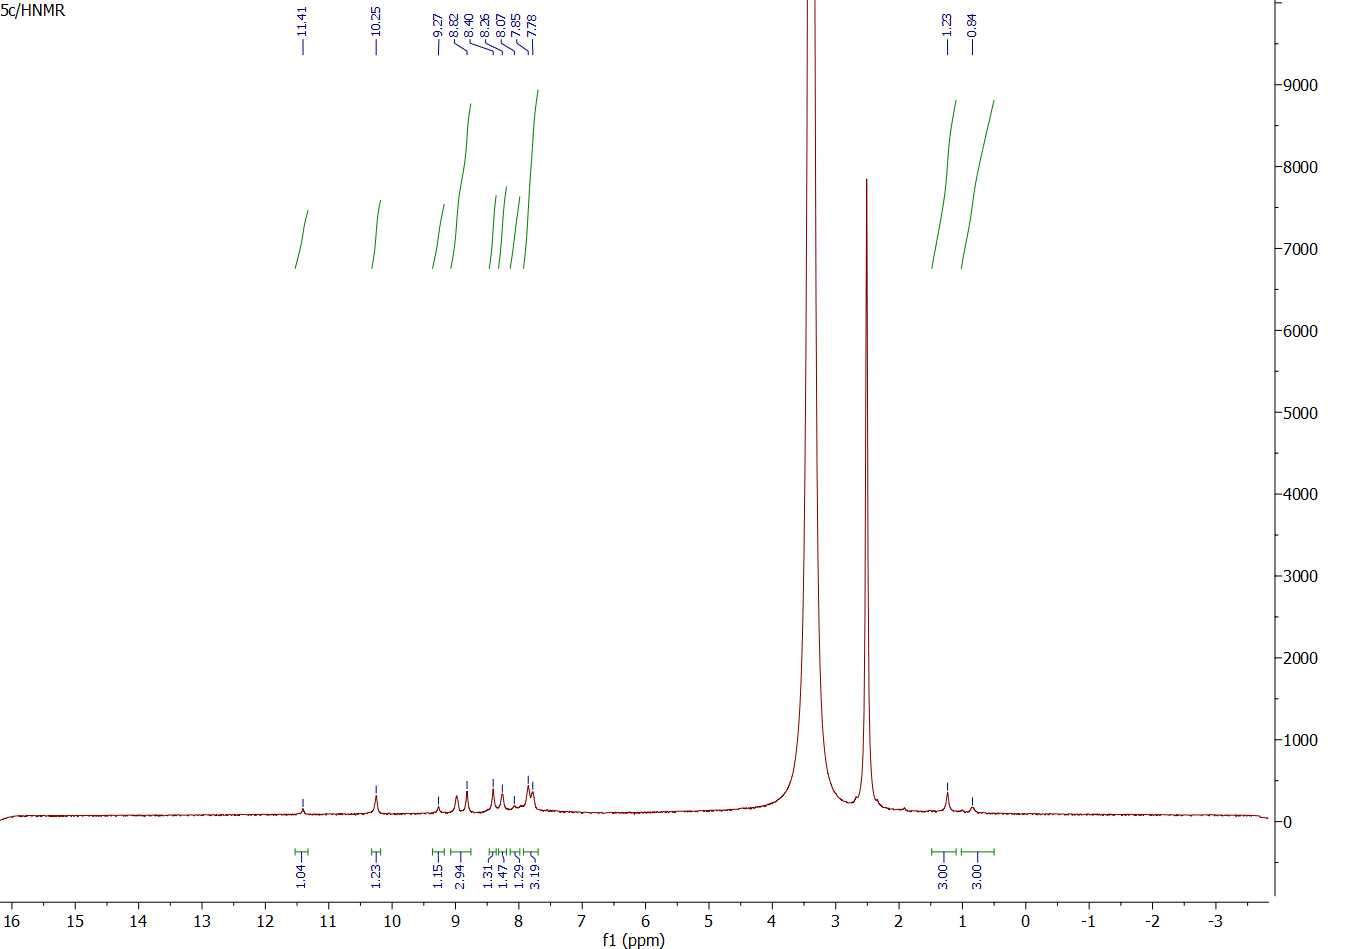


**Figure 30**: 1H-NMR spectrum of compound **5c**


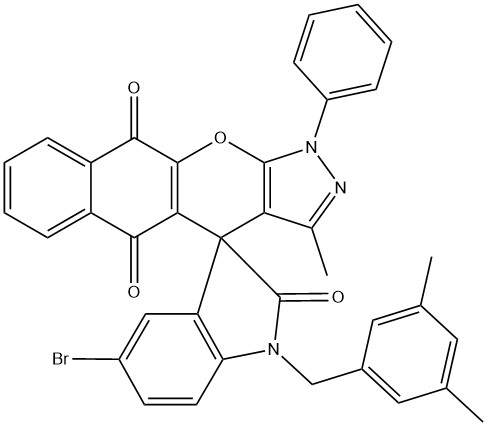

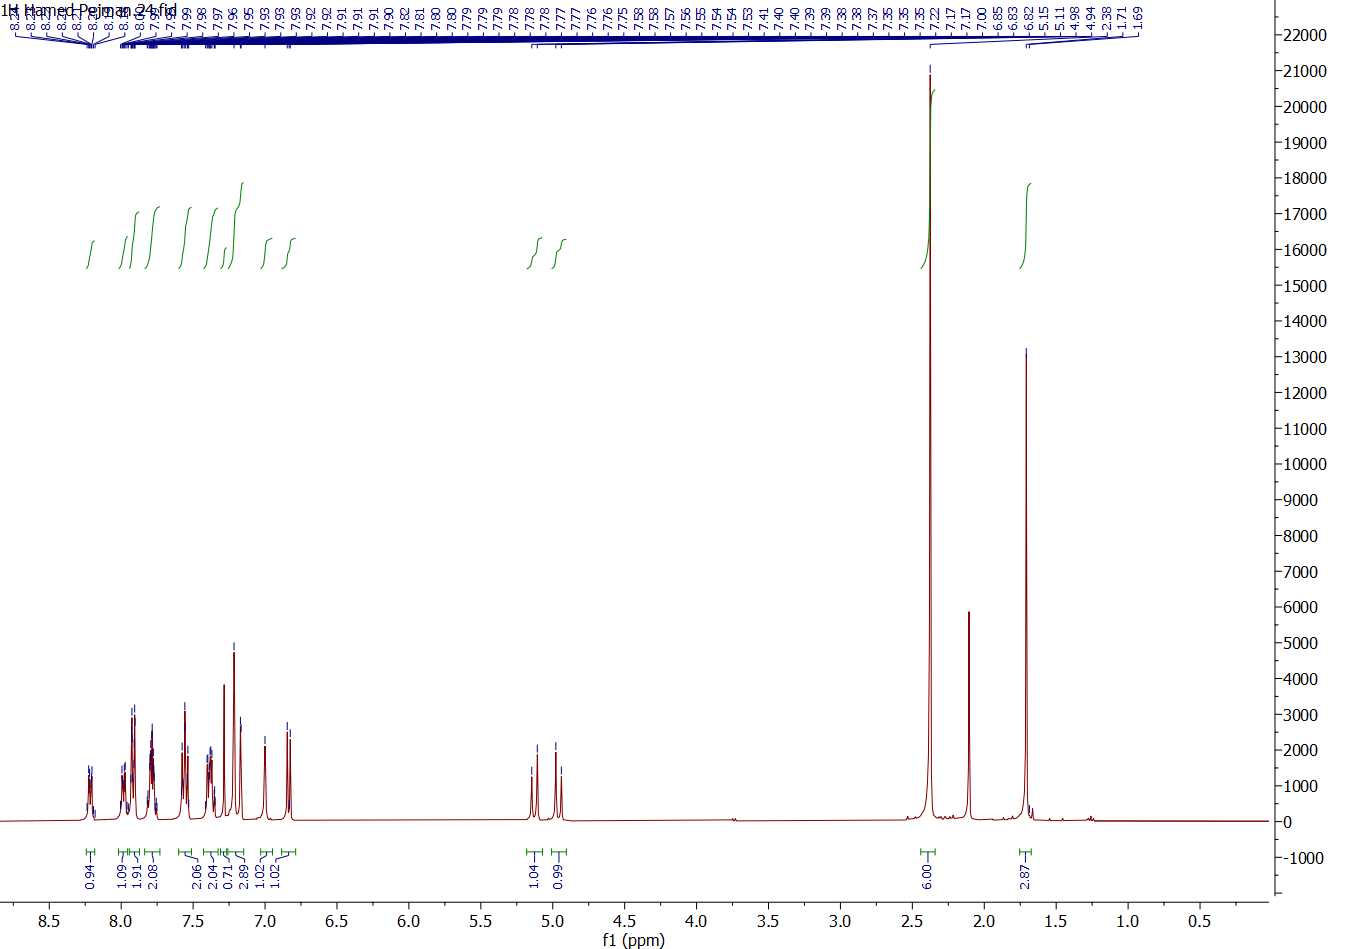


**Figure 31**: 1H-NMR spectrum of compound **5d**

**
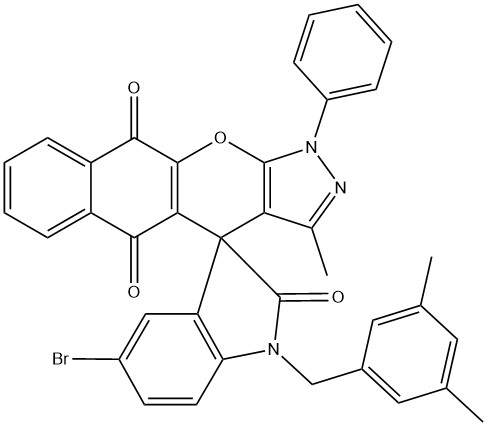
**


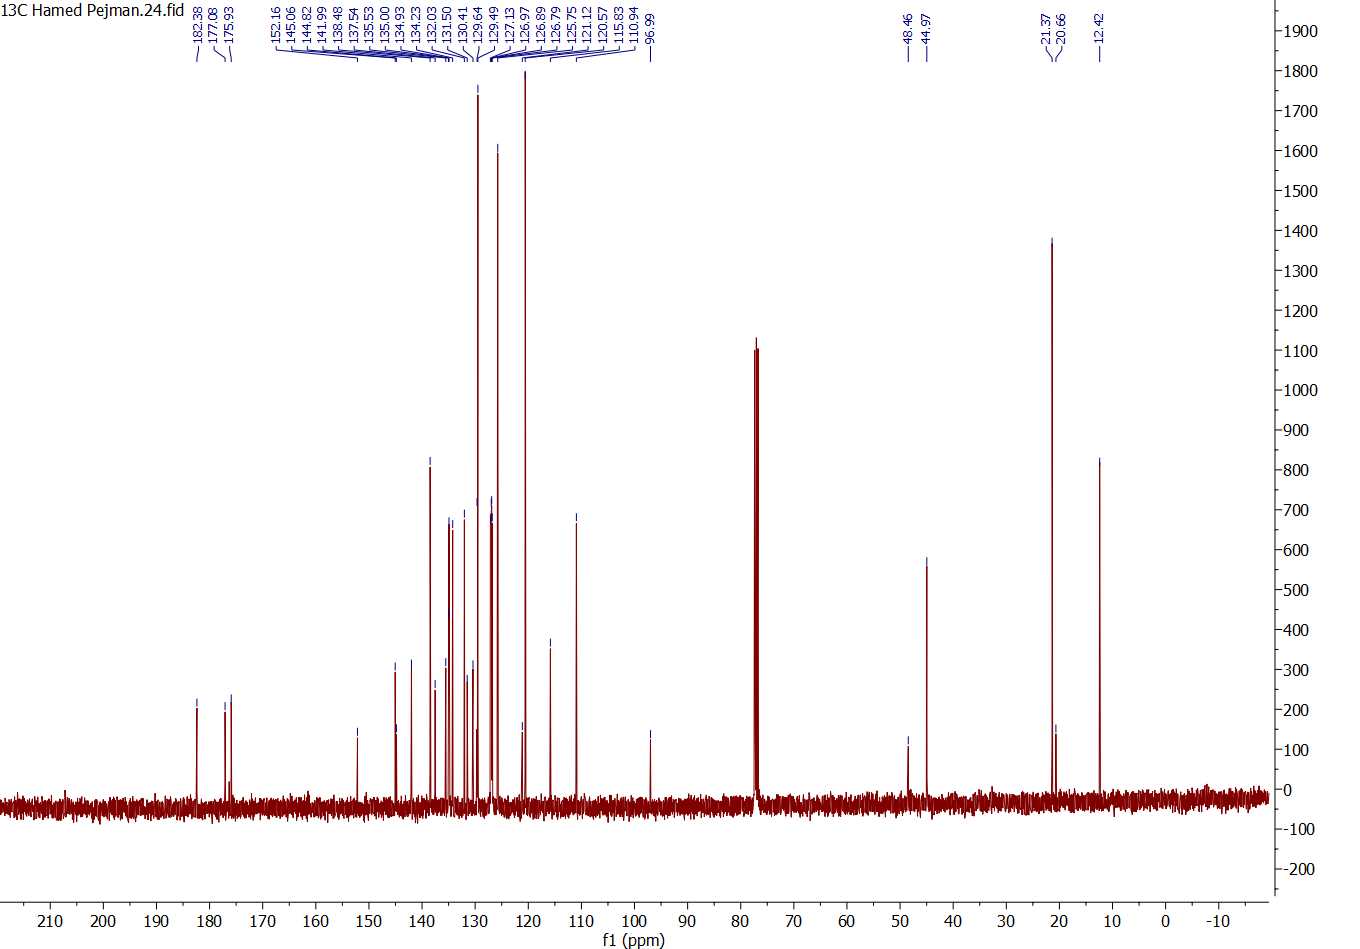


**Figure 32**: 13C-NMR spectrum of compound **5d**


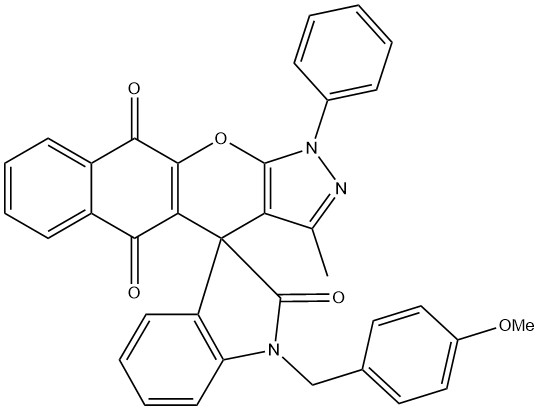

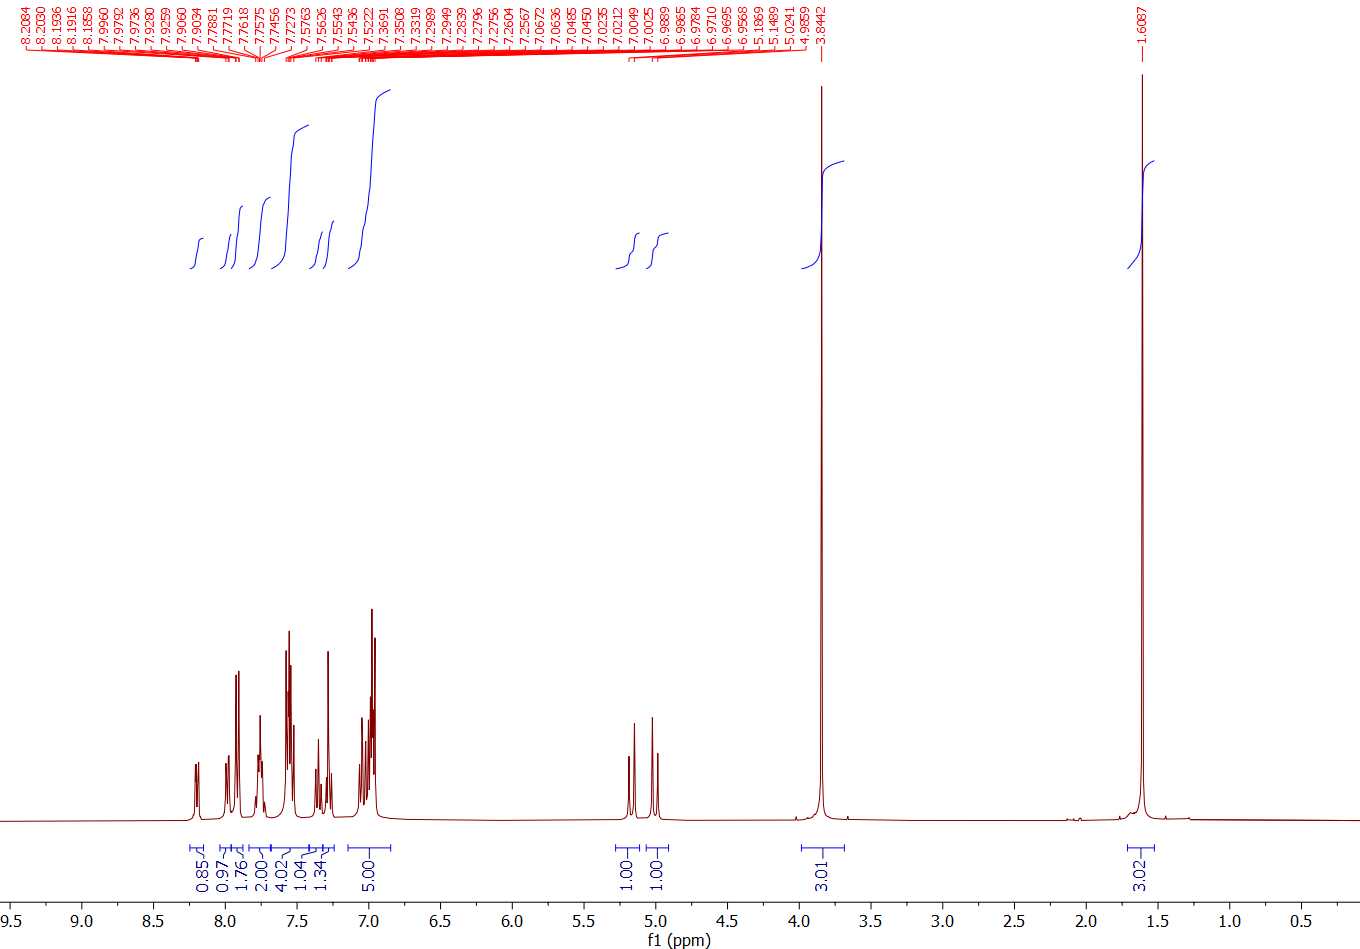


**Figure 33**: 1H-NMR spectrum of compound **5e**


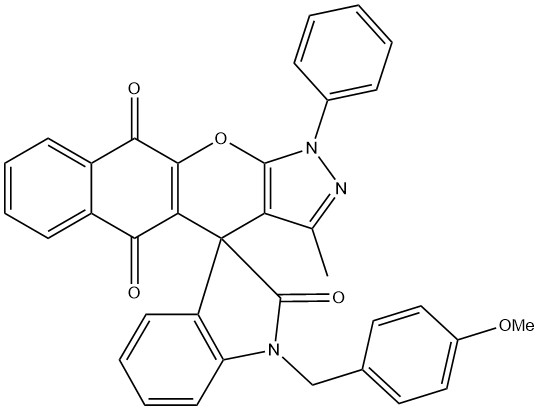


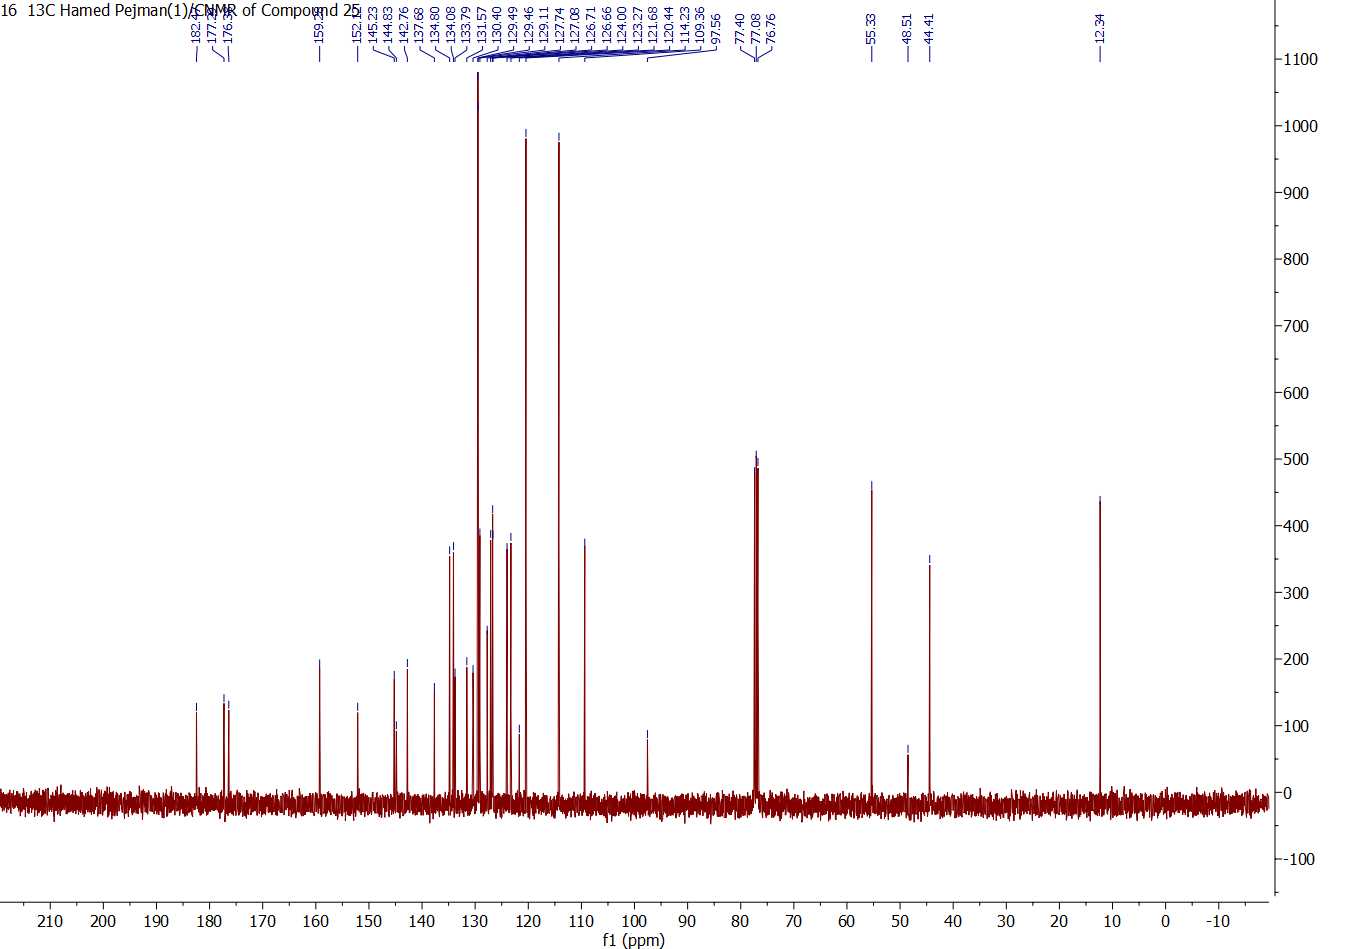


**Figure 34**: 13C-NMR spectrum of compound **5e**


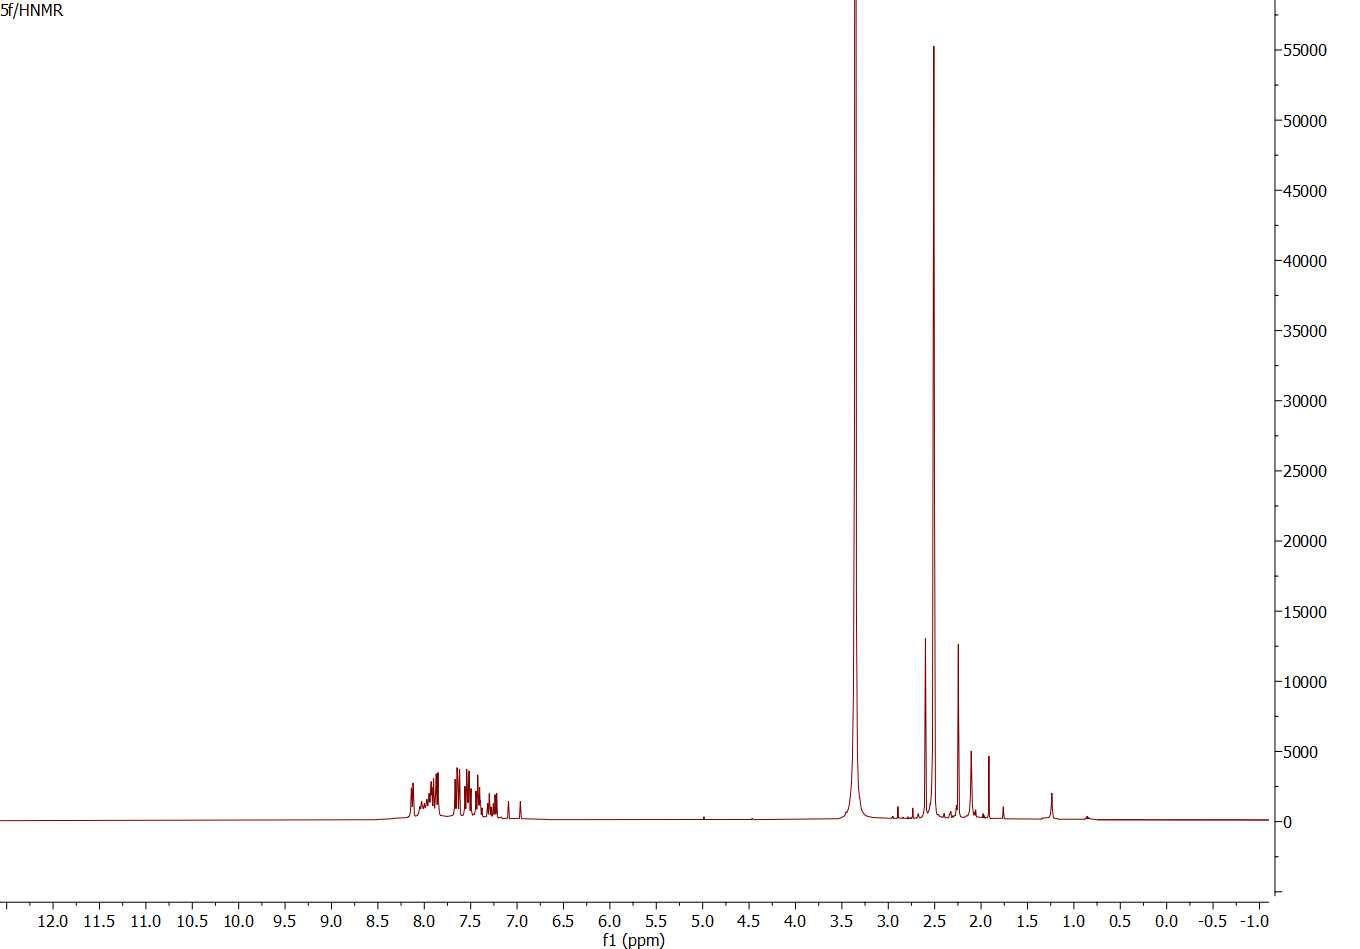


**Figure 35**: 1H-NMR spectrum of compound **5f**


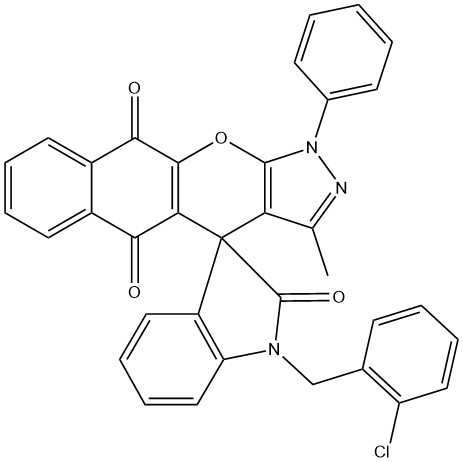

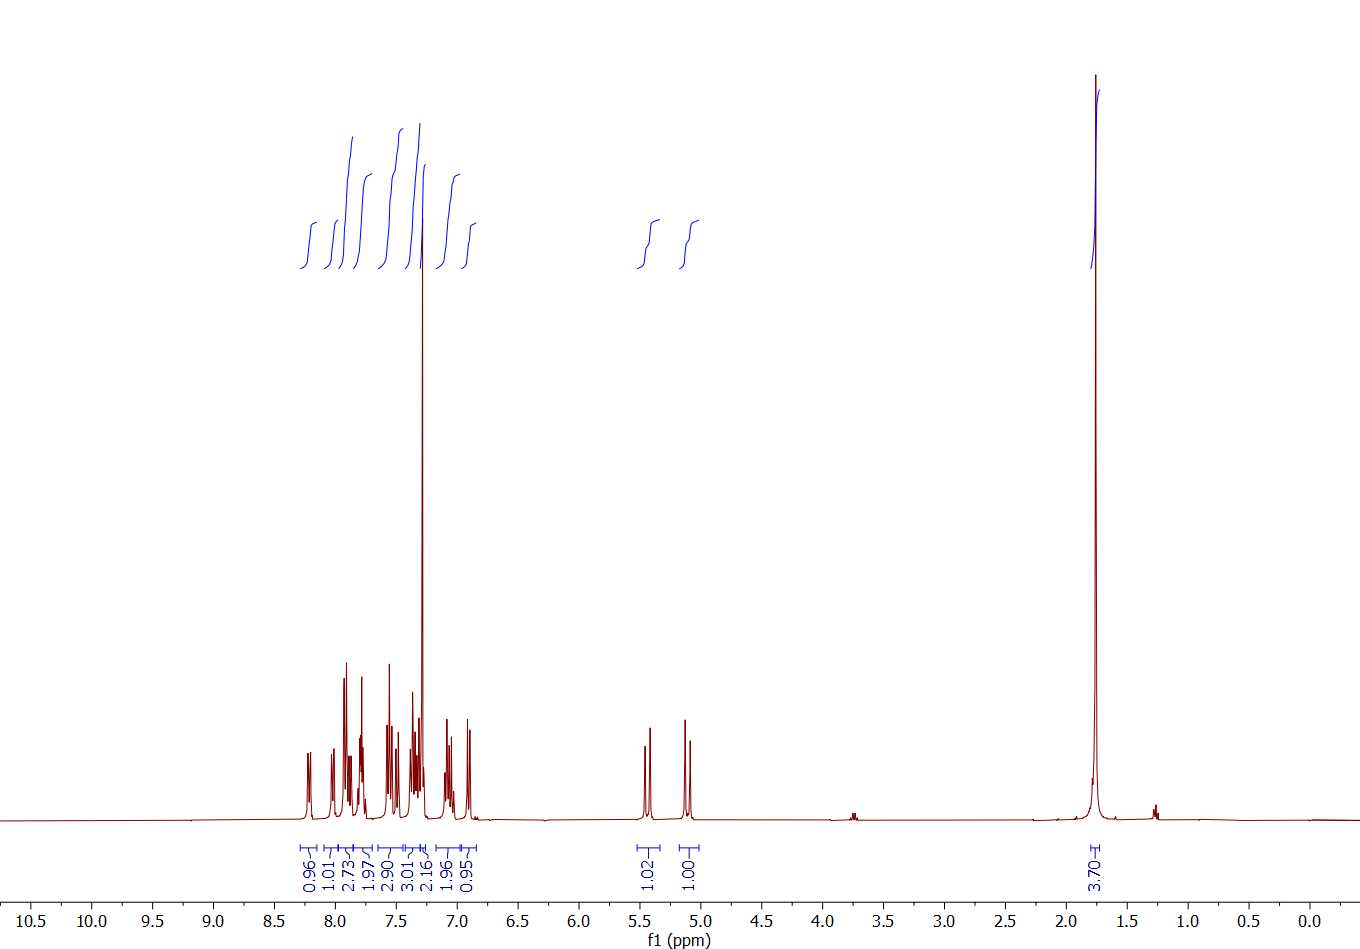


**Figure 36**: 1H-NMR spectrum of compound **5g**

**
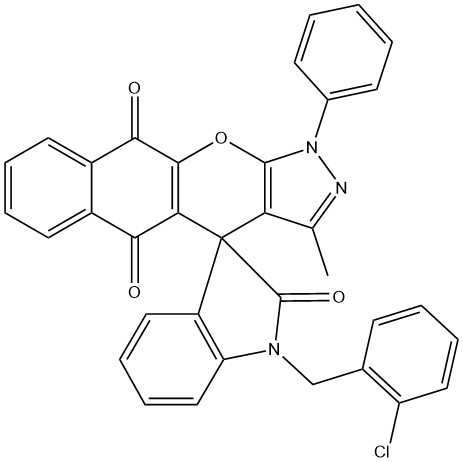
**


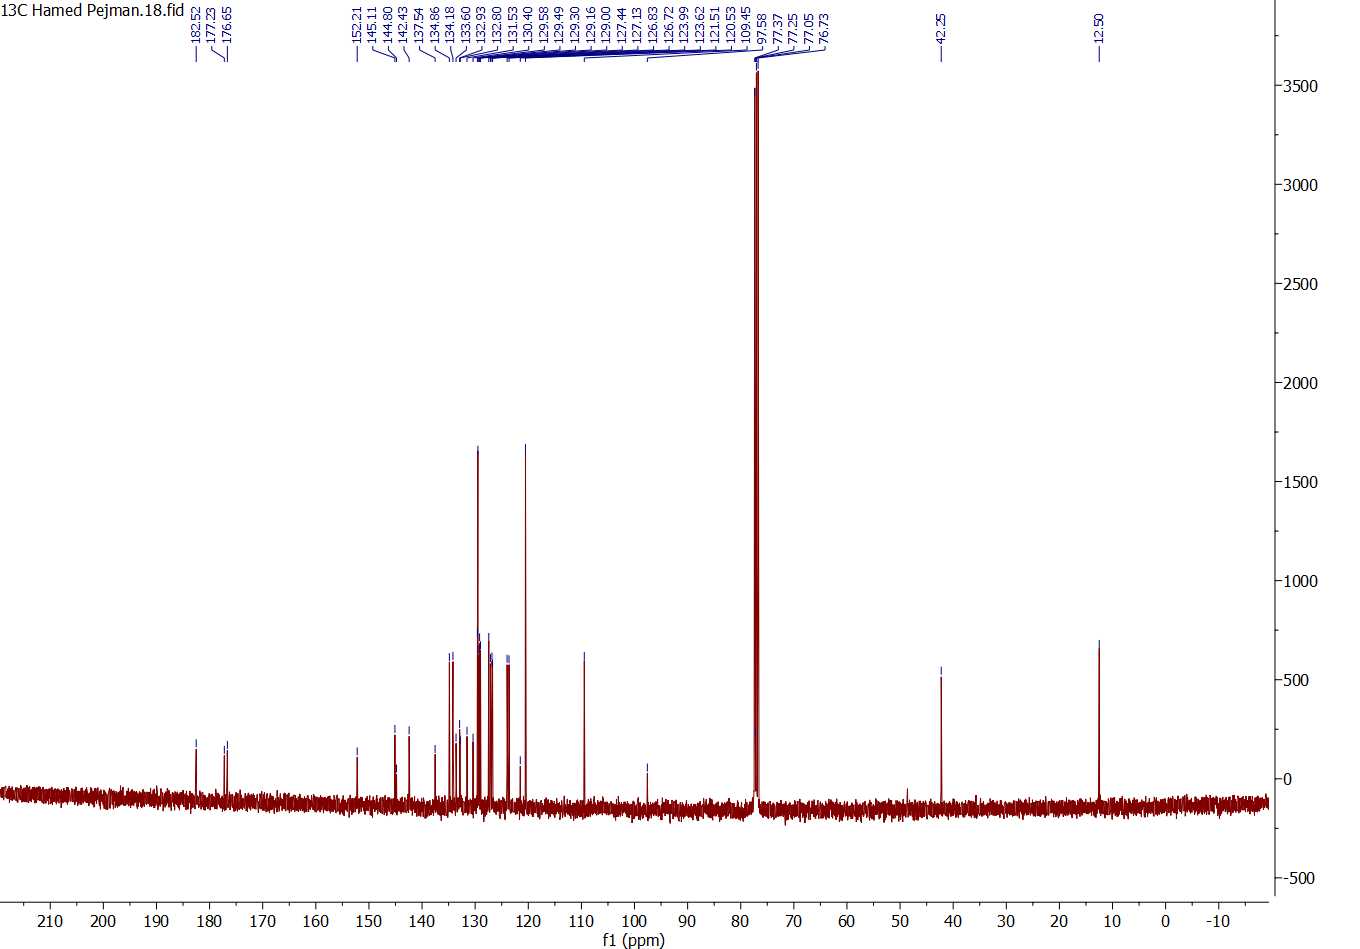


**Figure 37**: 13C-NMR spectrum of compound **5g**


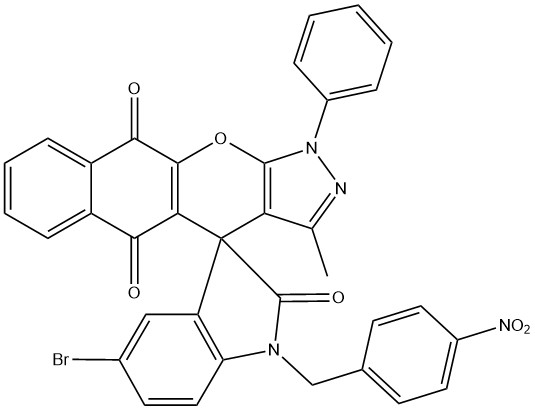

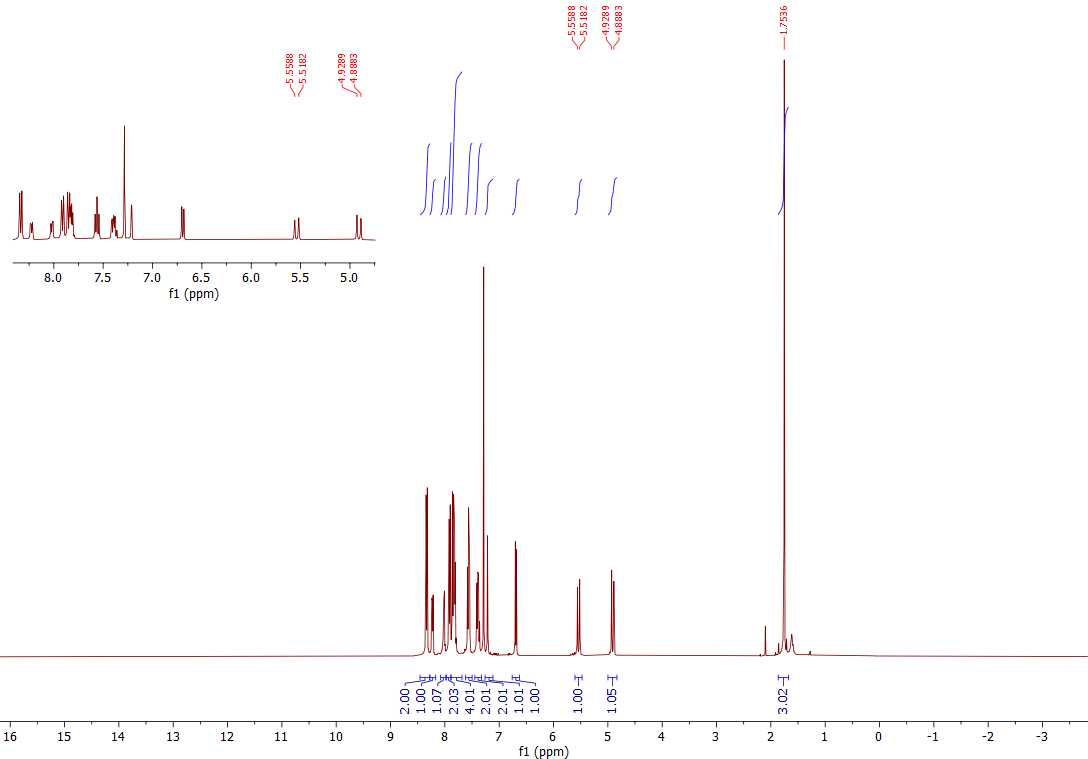


**Figure 38**: 1H-NMR spectrum of compound **5h**

**
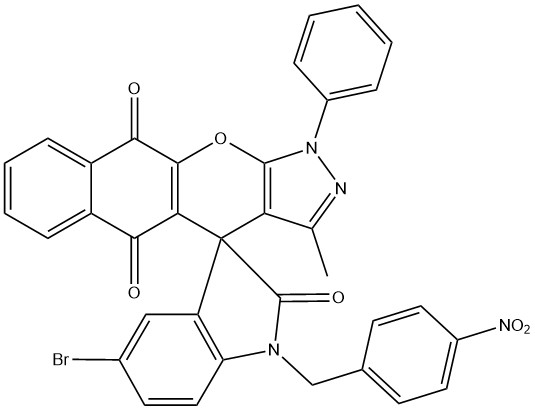
**


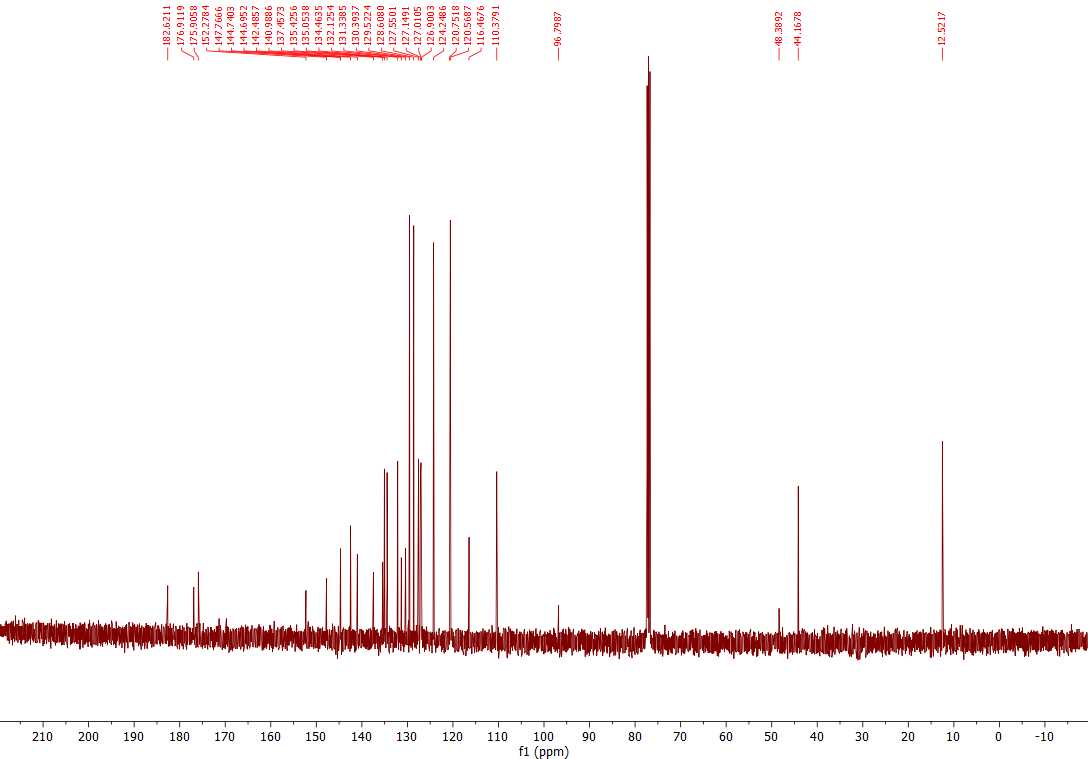


**Figure 39**: 13C-NMR spectrum of compound **5h**
